# Supplementary material for: Effectiveness of digital adherence technologies in improving tuberculosis treatment outcomes in four countries: a pragmatic cluster randomised trial protocol
Source: PubMed Central journal article supplement — BMJ Open. 2023 Mar 14;13(3):e068685. doi: 10.1136/bmjopen-2022-068685 (PMC10016242; doi:10.1136/bmjopen-2022-068685), 2023-03-14
Supplement: bmjopen-2022-068685.draft_revisions.pdf [file bmjopen-2022-068685.draft_revisions.pdf]

# BMJ Open

BMJ Open is committed to open peer review. As part of this commitment we make the peer review history of every article we publish publicly available.

When an article is published we post the peer reviewers' comments and the authors' responses online. We also post the versions of the paper that were used during peer review. These are the versions that the peer review comments apply to.

The versions of the paper that follow are the versions that were submitted during the peer review process. They are not the versions of record or the final published versions. They should not be cited or distributed as the published version of this manuscript.

BMJ Open is an open access journal and the full, final, typeset and author-corrected version of record of the manuscript is available on our site with no access controls, subscription charges or pay-per-view fees (<http://bmjopen.bmj.com>).

If you have any questions on BMJ Open's open peer review process please email [info.bmjopen@bmj.com](mailto:info.bmjopen@bmj.com)

# BMJ Open

## Effectiveness of digital adherence technologies in improving TB treatment outcomes in four countries: a pragmatic cluster randomized trial protocol

|                               |                                                                                                                                                                                                                                                                                                                                                                                                                                                                                                                                                                                                                                                                                                                                                                                                                                                                                                                                                                                      |
|-------------------------------|--------------------------------------------------------------------------------------------------------------------------------------------------------------------------------------------------------------------------------------------------------------------------------------------------------------------------------------------------------------------------------------------------------------------------------------------------------------------------------------------------------------------------------------------------------------------------------------------------------------------------------------------------------------------------------------------------------------------------------------------------------------------------------------------------------------------------------------------------------------------------------------------------------------------------------------------------------------------------------------|
| Journal:                      | <i>BMJ Open</i>                                                                                                                                                                                                                                                                                                                                                                                                                                                                                                                                                                                                                                                                                                                                                                                                                                                                                                                                                                      |
| Manuscript ID                 | bmjopen-2022-068685                                                                                                                                                                                                                                                                                                                                                                                                                                                                                                                                                                                                                                                                                                                                                                                                                                                                                                                                                                  |
| Article Type:                 | Protocol                                                                                                                                                                                                                                                                                                                                                                                                                                                                                                                                                                                                                                                                                                                                                                                                                                                                                                                                                                             |
| Date Submitted by the Author: | 27-Sep-2022                                                                                                                                                                                                                                                                                                                                                                                                                                                                                                                                                                                                                                                                                                                                                                                                                                                                                                                                                                          |
| Complete List of Authors:     | <p>Jerene, Degu; KNCV Tuberculosis Foundation, Levy, Jens; KNCV Tuberculosis Foundation van Kalmthout, Kristian; KNCV Tuberculosis Foundation Rest, Job; KNCV Tuberculosis Foundation McQuaid, Christopher; London School of Hygiene &amp; Tropical Medicine, Infectious Disease Epidemiology Quaiife, Matthew; London School of Hygiene &amp; Tropical Medicine, Infectious Disease Epidemiology Charalambous, Salome; Aurum Institute, 29 Queens Road, Johannesburg, 2041, South Africa. Gamazina, Katya; PATH Garfin, AM Celina; Department of Health Mleoh , Liberate ; National Tuberculosis and Leprosy Programme, Dodoma, Tanzania, Department of Preventive Services Terleieva, Yana ; 7DepartmentDepartment of Coordination of TB Treatment Programs Bogdanov, Alexsey ; PATH Maraba, Noriah; Aurum Institute, 29 Queens Road, Johannesburg, 2041, South Africa. Fielding, Katherine; London School of Hygiene &amp; Tropical Medicine, Infectious Disease Epidemiology</p> |
| Keywords:                     | Tuberculosis < INFECTIOUS DISEASES, Public health < INFECTIOUS DISEASES, Tropical medicine < INFECTIOUS DISEASES, Epidemiology < INFECTIOUS DISEASES                                                                                                                                                                                                                                                                                                                                                                                                                                                                                                                                                                                                                                                                                                                                                                                                                                 |
|                               |                                                                                                                                                                                                                                                                                                                                                                                                                                                                                                                                                                                                                                                                                                                                                                                                                                                                                                                                                                                      |

SCHOLARONE™  
Manuscripts

1  
2  
3 1 **Effectiveness of digital adherence technologies in improving TB treatment**  
4 **outcomes in four countries: a pragmatic cluster randomized trial protocol**  
5  
6  
7 3  
8  
9 4

10 5 Authors

11 6 Degu Jerene<sup>1</sup>, Jens Levy<sup>1</sup>, Kristian van Kalmthout<sup>1</sup>, Job van Rest<sup>1</sup>, Christopher Finn  
12 7 McQuaid<sup>2</sup>, Matthew Quaife<sup>2</sup>, Salome Charalambous<sup>3</sup>, Katya Gamazina<sup>4</sup>, Anna Marie  
13 8 Celine G. Garfin<sup>5</sup>, Liberate Mleoh<sup>6</sup>, Yana Terleieva<sup>7</sup>, Alexsey Bogdanov<sup>4</sup>, Noriah  
14 9 Maraba<sup>3</sup>, Katherine Fielding<sup>2</sup>  
15  
16  
17  
18

19 10  
20 11 Affiliations

21 12 <sup>1</sup>KNCV Tuberculosis Foundation, the Hague, Netherlands

22 13 <sup>2</sup>TB Centre and Department of Infectious Disease Epidemiology, Faculty of  
23 14 Epidemiology and Population Health, London School of Hygiene & Tropical  
24 15 Medicine, London, UK

25 16 <sup>3</sup>The Aurum Institute, Johannesburg, South Africa

26 17 <sup>4</sup>PATH, Kiev, Ukraine

27 18 <sup>5</sup> Infectious Diseases for Prevention and Control Division, Disease Prevention and  
28 19 Control Bureau, Department of Health, Manila, the Philippines

29 20 <sup>6</sup>National TB and Leprosy Programme (NTLP), Ministry of Health and Social  
30 21 Welfare, Tanzania

31 22 <sup>7</sup>Department of Coordination of TB Treatment Programs, Kiev, Ukraine  
32  
33  
34  
35

36 23  
37 24  
38 25 Correspondence to Dr Degu Jerene

39 26 KNCV Tuberculosis Foundation, the Hague, Netherlands

40 27 [degujerene@gmail.com](mailto:degujerene@gmail.com)  
41  
42  
43  
44  
45  
46  
47  
48  
49  
50  
51  
52  
53  
54

55 31 Journal: **BMJ Open**  
56  
57  
58  
59  
60

1  
2  
3 34 Abstract

4  
5 35 **Introduction**

6 36 Successful treatment of tuberculosis (TB) depends to a large extent on good  
7 adherence to treatment regimens which in many countries relies on directly observed  
8 treatment (DOT). This in turn requires frequent visits to health facilities. High costs to  
9 patients, stigma, and burden to the health system challenged the DOT approach.  
10 Digital adherence technologies (DATs) have emerged as possibly more feasible  
11 alternatives to DOT but there is conflicting evidence on their effectiveness and  
12 feasibility. Our primary objective is to evaluate whether the implementation of DATs  
13 with daily monitoring and a differentiated response to patient adherence would reduce  
14 poor treatment outcomes compared with the standard of care (SOC). Our secondary  
15 objectives include: to evaluate the proportion of patients lost to follow-up; to compare  
16 effectiveness by DAT type; to evaluate the feasibility and acceptability of DATs; to  
17 describe factors affecting the longitudinal engagement of patients with the  
18 intervention; and to use a simple model to estimate the epidemiological impact and  
19 cost-effectiveness of the intervention from a health system perspective.  
20  
21  
22  
23  
24  
25  
26  
27  
28  
29  
30  
31  
32

33 51 **Methods and analysis**

34 52 This is a pragmatic multi-country two-arm cluster-randomized trial, with health  
35 facilities as the unit of randomization. Facilities will first be randomized to either the  
36 DAT or SOC arm, and then the DAT arm will be further randomized into medication  
37 sleeve/labels or smart pill box in a 1:1:2 ratio for the smart pill box, medication  
38 sleeve/label or the SOC respectively. We will use data from the digital adherence  
39 platform and a separate research database of data available from routine data  
40 collection. In the main analysis, we will employ an intention-to-treat approach to  
41 evaluate treatment outcomes.  
42  
43  
44  
45  
46  
47  
48  
49

50 61 **Ethics and dissemination**

51 62 The study has been approved by the WHO Ethical Review Committee (0003296), and  
52 by country-specific committees. The results will be shared at national and  
53 international meetings and will be published in peer-reviewed journals.  
54  
55  
56  
57  
58  
59  
60

66 Trial registration number: ISRCTN17706019

1  
2  
3 68 **Strengths and limitations of this study**  
4

- 5 69 • This is a multi-country trial using rigorous methods to evaluate the effectiveness  
6 of DAT on treatment outcomes, going beyond measuring improvements in  
7 70 adherence to treatment  
8 71  
9  
10 72 • The study will provide important evidence on patient and provider acceptability  
11 and feasibility necessary to provide country level guidance on decisions to adopt,  
12 73 implement and scale-up DATs across varying contexts  
13 74  
14  
15 75 • Changes in the standard of care across countries due to the COVID-19 may have a  
16 confounding effect as some of the changes included the use of digital technologies  
17 76  
18  
19 77

## 78 Introduction

79 About a quarter of the world population is infected with mycobacterium tuberculosis  
80 bacilli, and about 10 million people develop active tuberculosis (TB) each year. Of  
81 those with active TB, about a third are not detected by the health system.

82 Furthermore, >10% of those detected are not successfully treated. (1) As a result, the  
83 global TB treatment success rate remained below the 20% reduction interim target  
84 between 2015 and 2020. (2)

85  
86 To improve treatment outcomes, directly observed treatment (DOT) has been the  
87 standard recommendation since 1995. (3) However, DOT is no longer held as an  
88 adequate patient-centered model for TB care. (4) DOT by health care workers present  
89 challenges to patients owing to transportation costs, and lost income due to clinic  
90 appointments which can contribute to non-adherence. The evidence that DOT  
91 substantially improves treatment completion or cure relative to self-administration is  
92 mixed. (5, 6)

93  
94 In recent years, digital adherence technologies (DATs) such as electronic medication  
95 monitors and text messaging, have emerged as alternatives to DOT. (7) Electronic  
96 medication boxes are medication monitoring devices that store TB medications, give  
97 audio-visual reminders to the patient, and record and transmits patients' dosing  
98 history. The medication sleeve is a type of electronic medication monitor that consists  
99 of medication blisters wrapped in special envelopes with printed codes. Patients use  
100 these codes when making a toll-free call/text to let their health care provider know  
101 when they have taken their medication. (7) In addition to reminding patients to take  
102 their TB medications, DATs provide mechanisms for compiling patient dosing  
103 histories that provide their health care providers with the ability to monitor adherence  
104 and to provide prioritized follow-up differentiated care. While the use of DATs is  
105 recommended, evidence that such technologies improve treatment outcomes is still  
106 limited.

107  
108 Recent randomized studies in countries in Africa and Asia documented mixed results  
109 regarding effectiveness of medication monitoring to reduce poor medication  
110 adherence. (8-14) For the purposes of informing policy makers with information  
111 about if when and where to use DATs, inference from RCTs is difficult due to the fact

1  
2  
3 112 that RCTs often do not reflect the real-life circumstances under which such tools  
4 113 would be employed in programmatic settings. Furthermore, the patient and health-  
5 114 care provider acceptability and uptake of these tools have been shown to be variable  
6 115 in different countries and settings. (15-17). Cultural or material circumstances may  
7 116 operate differently on the utility or acceptability of DATs to deliver the targeted  
8 117 treatment support. Data from individual randomized trials often do not provide  
9 118 country programs with the information needed to replicate their success in real-life  
10 119 settings and specific contexts. A pragmatic trial design implemented under real-life  
11 120 situation therefore is useful to provide the necessary evidence that can transform the  
12 121 way treatment support is provided in high TB burden settings.  
13  
14  
15  
16  
17  
18  
19  
20  
21

22 123 The Adherence Support Coalition to End TB (ASCENT) study will evaluate  
23 124 effectiveness of medication sleeves/labels and smart pill boxes linked to a web-based  
24 125 adherence platform, to create a differentiated care response to patient adherence in  
25 126 relation to end of treatment outcomes. A related study in Ethiopia will go further to  
26 127 provide effectiveness in relation to disease free outcomes. (18). In addition to  
27 128 effectiveness, ASCENT will collect data on DAT engagement and fidelity to the  
28 129 adherence tools, costs, and projections of epidemiological impact and cost-  
29 130 effectiveness. Taken together, the ASCENT studies will provide valuable evidence of  
30 131 effectiveness as well as patient and provider acceptability and feasibility necessary to  
31 132 provide country level guidance on decisions to adopt, implement and scale-up DATs  
32 133 across varying contexts around the world.  
33  
34  
35  
36  
37  
38  
39  
40  
41

42 134

### 43 135 **Objectives**

44 136

45  
46 137 The primary objective of this study is to evaluate whether the implementation of DAT  
47 138 with daily monitoring and differentiated response to patient adherence decreases the  
48 139 proportion of patients with poor treatment outcome compared to the standard of care  
49 140 in their respective countries. Poor treatment outcome is a composite of treatment  
50 141 outcomes that include death, treatment failure, or loss to follow-up (LTFU). The  
51 142 secondary objectives include evaluating individual components of the composite  
52 143 outcomes i.e., the proportion of patients LTFU, and time to treatment completion.  
53 144 Additionally, we will evaluate the effect of the individual DAT systems employed,  
54 145 medication labels or smart pill box, in relation to the SOC. Furthermore, we will  
55  
56  
57  
58  
59  
60

1  
2  
3 146 describe: the longitudinal engagement of patients with the DAT; the fidelity to the  
4 147 intervention including device and technological failures (e.g., poor cellular service  
5 148 coverage); the wider epidemiological impact of the interventions through  
6  
7 149 mathematical models; the cost-effectiveness of the intervention from a health system  
8  
9 150 perspective; and evaluate the feasibility and acceptability of DATs for patients as well  
10  
11 151 as health care workers.  
12  
13  
14 152

## 15 153 **Methods/ Design**

### 16 154 ***Study design***

17  
18 155  
19  
20 156 Figure 1 shows an overview of the study design. These are pragmatic two-arm cluster-  
21  
22 157 randomized trials, with health facilities as the unit of randomization, conducted in  
23  
24 158 four countries. Facilities in each country were randomized (1:1) to either the  
25  
26 159 intervention (DAT) or SOC arm. A second randomization among the intervention arm  
27  
28 160 clusters (1:1) was conducted to determine which of two interventions to employ  
29  
30 161 (medication sleeve/label or smart pill box). In each country facilities from multiple  
31  
32 162 regions/districts were randomized using stratification and restriction. Since labels  
33  
34 163 were not implemented in Ukraine, the randomization was 1:1.  
35  
36 164

### 37 165 ***Study setting***

38  
39 166 The study is operating in four countries that are among the top 30 high-burden TB or  
40  
41 167 MDR-TB countries: Ukraine, Tanzania, South Africa and the Philippines. These  
42  
43 168 countries were selected based on epidemiological, socio- economic, geographic,  
44  
45 169 infrastructural and health system factors. Facilities will include a mix of both large  
46  
47 170 and small, urban and rural facilities. Eligible facilities needed to have previously  
48  
49 171 notified TB patients and expressed willingness and capability to participate in study  
50  
51 172 activities.  
52  
53 173  
54  
55 174  
56  
57 175  
58  
59 176  
60 177  
178



179

180

181

182

183

### 184 ***Study population***

185 All adult DS-TB patients in the intervention and standard of care facilities contribute  
186 to the effectiveness evaluation using their treatment outcomes as reflected in the TB  
187 registries, typically after 6 months. Participation in using the DAT intervention is  
188 extended to all adult DS-TB patients in the selected intervention facilities upon  
189 initiation of their therapy. In Ukraine where patients start treatment as inpatients,  
190 participants start the intervention at discharge. Those providing consent will be  
191 enrolled onto the ASCENT adherence platform and provided with the DAT.

192

### 193 ***Interventions***

194 In three countries (South Africa, Tanzania, and Philippines) facilities will be  
195 randomized to one of two technologies (smart pill box or medication sleeve/label) to  
196 transmit to the ASCENT web-based digital adherence platform for treatment  
197 adherence monitoring. This allows the TB care provider to use the ASCENT  
198 adherence data platform to evaluate daily dosing and offer differentiated care specific  
199 to the country as appropriate. In Ukraine, all Rayons (analogous to facilities)  
200 randomized to the DAT intervention will employ the smart-pill box, because fixed  
201 dose combinations do not exist for DS TB and would not be suitable for medication  
202 sleeves/labels.

203

204 The implementation starts with a run-in phase when in-country staff are trained, and  
205 the DAT adherence platform is integrated into the patient care pathway, followed by  
206 the main enrolment phase. After an introduction to the study and providing written  
207 consent, all adults (locally defined) diagnosed with DS-TB are offered the DAT  
208 technology and differentiated care intervention. By providing written informed  
209 consent, patients agree to use the DAT assigned to the facility during their TB  
210 treatment, and for researchers to (a) access their de-identified dosing history data on

1  
2  
3 211 the ASCENT adherence platform to support the health facility staff to operationalize  
4 212 the DAT intervention and (b) use this de-identified data as well as accessing data on  
5 213 treatment outcomes to evaluate effectiveness and fidelity of the intervention.  
6  
7  
8  
9 214

10 215 Figure 1- overview of the study design  
11  
12

### 13 216 **Intervention arm 1 – smart pill box (all countries)**

14  
15 217 Upon providing informed consent, participants receive a smart pill box ((also known  
16 218 as the Medication Event Reminder Monitor system or MERM). The TB drugs are  
17 219 placed in the smart pill box that is configured to routinely signal a reminder to the  
18 220 patient by either an audible signal (beep) and/or a blinking light once a day at a time  
19 221 based on the patient’s preference. On a daily basis, an electronic device embedded in  
20 222 the box sends a signal through a built-in mobile internet connection with all box  
21 223 openings of the patient to the ASCENT digital adherence platform. If the internet  
22 224 connectivity is unavailable, the opening events are stored on the device to be uploaded  
23 225 upon resumption of connectivity.  
24  
25  
26  
27  
28  
29  
30  
31  
32

### 33 227 **Intervention arm 2 – medication sleeves/labels**

34  
35 228 Upon providing informed consent, participants with secure access to a mobile phone  
36 229 employ one of two analogous methods to send notification of their dosing to the  
37 230 ASCENT platform. Participants who do not have access to a mobile phone are given a  
38 231 smart pill box.  
39  
40  
41  
42  
43

44 233 Medication sleeves- participants have their Fixed Dose Combination (FDC) blister  
45 234 pack containing their medication placed in a custom card-stock medication sleeve  
46 235 with a series of unpredictable hidden codes that are revealed only upon removal of the  
47 236 daily pill.  
48  
49  
50

51 237  
52 238 Medication labels - In countries where the FDC packaging was variable and therefore  
53 239 difficult to reliably supply custom cardstock, we employed a modified system.  
54 240 Participants have a label, containing a code, placed on each of their fixed-dosed  
55 241 blister-packaged TB medication.  
56  
57  
58  
59  
60

1  
2  
3 243 For both methods, when their daily dose is taken, participants message the code using  
4 244 a toll-free text, which automatically logs their daily dose to the ASCENT web-based  
5 245 application. Box open or short message service (SMS) sent by patient is assumed to  
6  
7 246 be dose taken.  
8  
9

10 247  
11  
12

### 13 248 **The Standard of Care arm**

14 249 Patients in health facilities randomized to the control arm receive the current standard  
15 250 of care according to their country guidelines. In the Philippines and Tanzania, a  
16 251 treatment partner (TP) is identified by the patient and Public Health Nurse and  
17 252 patients are either observed by the TP or self-administer “with trust”. In South Africa  
18 253 patients employ self-administration, recording their taking medication on a TB card.  
19 254 Non-adherence according to this may prompt DOT (either at home or in the clinic). In  
20 255 Ukraine, outpatient adherence is monitored using either home-based or facility-based  
21 256 DOT.  
22  
23  
24  
25  
26  
27  
28  
29

30 257

### 31 258 **Differentiated care delivery based on adherence to treatment**

32 259 Patients utilizing the DAT at facilities randomized to the intervention arm have their  
33 260 adherence data recorded on the ASCENT adherence platform. These data are  
34 261 displayed in real-time in a single view via the mobile Android app to allow health  
35 262 care providers to visualize the data analytics and evaluate their medication taking  
36 263 behavior. Health care providers are then able to identify patients who have not taken  
37 264 their medication according to the patient calendar or by viewing Task Lists that  
38 265 contain patients with 1, 2 or 3 days of non-adherence. They then employ constructive  
39 266 measures to encourage timely medication adherence according to the differentiated  
40 267 response algorithm approved by the National TB Program (NTP). These measures  
41 268 include messaging educational reinforcements, reminders, phone calls and home visits  
42 269 progressively. Each country has a differentiated response algorithm that has been  
43 270 arrived at in consultation with the community advisory board, civil society stake  
44 271 holders, and approved by the country NTP.  
45  
46  
47  
48  
49  
50  
51  
52  
53  
54  
55  
56  
57  
58  
59  
60

272 **Randomization**

273 Randomization of clusters (treatment facilities or Rayons in Ukraine) to intervention  
 274 or SOC arm were conducted by stratification and restriction in order to ensure balance  
 275 between the intervention arms and SOC arm. Studies in the Philippines, Ukraine and  
 276 Tanzania were stratified by poor treatment outcome and South Africa and the  
 277 Philippines by province. Restriction varied by country based on evaluation of  
 278 predictors of outcomes utilizing existing notification data. The stratification and  
 279 restriction variables are shown in Table 1.

280 Table 1. Stratification and restriction variables per country

| Country      | Stratification variables          | Restriction variables                                                                                                            |
|--------------|-----------------------------------|----------------------------------------------------------------------------------------------------------------------------------|
| Philippines  | Province; poor treatment outcome* | Poor treatment outcome*; number of DS-TB notifications; facility type                                                            |
| Ukraine      | Poor treatment outcome            | Treatment failure*; number of DS-TB notifications; Oblast (district)                                                             |
| Tanzania     | Poor treatment outcome            | treatment failure*; number of DS-TB notifications; urban (vs rural); HIV co-infection rate; facility serving mining communities. |
| South Africa | Province (2 strata)               | Treatment success*; urban/rural, number of DS-TB notifications; facility type                                                    |

281 \* Using data from a 12–18-month period abstracted from the TB register pre-  
 282 implementation of the intervention

284 **Trial outcomes**

285 **Primary outcome**

286 The primary endpoint is a poor end of treatment outcome, a composite indicator that  
 287 includes documented treatment failure, lost to follow-up or death.

288 **Secondary outcomes**

289 **Secondary outcomes – effectiveness and feasibility**

- 290 • The proportion of adult DS-TB patients who are lost to follow-up during  
 291 treatment

- 1  
2  
3 292 • Time to treatment completion, among DS-TB patients  
4  
5 293 • The proportion of adult DS-TB patients with poor treatment outcomes for  
6  
7 294 standard of care versus (1) medication sleeves/labels and (2) smart pill box  
8  
9 295 • Intervention arm only:  
10  
11 296 • Patterns of longitudinal technology engagement in the intensive- and  
12  
13 297 continuation phase  
14  
15 298 • The proportion of patients who had a differentiated response due to non-  
16  
17 299 adherence, among all patients and among non-adherent patients  
18  
19 300 • The proportion of patients who received phone calls, home visits, and  
20  
21 301 motivational counselling due to non-adherence

### 302 **Secondary outcomes - impact modelling**

- 22  
23 303 • The change in the incidence of TB arising from the impact that DATs may  
24  
25 304 have on TB transmission compared to current standard of care if the  
26  
27 305 intervention were to be scaled up  
28  
29 306 • A simplified cost-effectiveness of DAT compared to standard of care relative,  
30  
31 307 considering changes in relevant cost drivers such as number of clinic visits,  
32  
33 308 technology and training costs.

### 309 **Secondary outcomes – DR-TB patients**

- 34  
35 310 • Patterns of longitudinal technology engagement in the intensive- and  
36  
37 311 continuation phase  
38  
39 312 • The proportion of adult DR-TB patients with poor (interim) treatment  
40  
41 313 outcomes  
42  
43 314

44 315 There are several secondary outcomes which will be assessed in sub studies described  
45  
46 316 further below.  
47  
48 317

### 318 ***Sample size***

51  
52 319 For each country, we collected data from the TB registries in health facilities of the  
53  
54 320 selected regions/districts to provide an estimate of the harmonic mean of the number  
55  
56 321 of DS-TB registrations over an 18-month period and the percentage with poor  
57  
58 322 treatment outcome (treatment failure, and death and lost to follow-up during  
59  
60 323 treatment). We assumed a (conservative) coefficient of variation of poor outcome of

0.35 to arrive at the number of facilities in each of arm (DAT or Control) required to detect a reduction in the percentage with poor treatment outcome by 30% with 90% power and a type 1 error of 5%. Notable exceptions were applied to Ukraine, where health facilities are administered within rayons and randomization occurred at this level instead of the health facility level in other countries (Table 2). In Ukraine, due to the high proportion with poor outcomes, the study was powered to detect a reduction of 50%.

331

332 Table 2. Estimated cluster size and associated assumptions per country

| Country      | Harmonic Mean for the number of DS-TB registrations over 18 months | Standard of care: poor treatment outcomes (%) | Intervention: poor treatment outcomes (%) | Clusters (facilities) per arm: 90% power |
|--------------|--------------------------------------------------------------------|-----------------------------------------------|-------------------------------------------|------------------------------------------|
| Philippines  | 350                                                                | 9%                                            | 6.3%                                      | 31                                       |
| Tanzania     | 113                                                                | 12%                                           | 8.4%                                      | 38                                       |
| South Africa | 253                                                                | 25%                                           | 17.4%                                     | 29                                       |
| Ukraine      | 176                                                                | 31%                                           | 15.0%                                     | 8 (Rayons)                               |

333

334 ***Study procedures***335 **Study procedures in SOC and intervention facilities**

336 The four countries followed the same basic study procedures. In the SOC facilities, the procedures imposed by the study are minimal in order to reflect the standard practices relevant as the counterfactual experience for the intervention facilities. Table 3 summarizes procedures in the SOC and intervention facilities.

340

341 Study procedures in the intervention facilities were similarly minimized to include the necessary informed consent. All patients at both intervention and SOC arms received the same anti-TB treatment regimens according to their country NTP guidelines. This included employing fixed-dose combinations in three countries (The Philippines, Tanzania, and South Africa) and loose doses in Ukraine. At treatment initiation,

1  
2  
3  
4  
5  
6  
7  
8  
9  
10  
11  
12  
13  
14  
15  
16  
17  
18  
19  
20  
21  
22  
23  
24  
25  
26  
27  
28  
29  
30  
31  
32  
33  
34  
35  
36  
37  
38  
39  
40  
41  
42  
43  
44  
45  
46  
47  
48  
49  
50  
51  
52  
53  
54  
55  
56  
57  
58  
59  
60

346 patients receive the same basic education based on NTP guidelines to ensure the same  
347 basic understanding of their tuberculosis and the importance of adherence to their  
348 treatment. TB focal persons and other health care staff underwent training for this in  
349 order to ensure a comparable baseline against which improvement from the DAT  
350 intervention.

351

352 Also, in both SOC and DAT facilities, the same information in the form of  
353 prominently displayed posters informing TB patients that the facility is participating  
354 in research and that information about their final de-identified treatment outcome will  
355 be collected. Patients were given the option to opt-out if they do not want that their  
356 data to be used for research purposes. Specifically, the poster states: *“If you are  
357 diagnosed with TB, information about the results of your treatment will be collected  
358 without using your name. If you would like the results of your treatment not to be used  
359 for this research, please inform the people giving you your TB care”*.

360

361

362

363 **Table 3: Comparison of activities between intervention and standard of care**364 **facilities**

| Activities                              | Intervention facility                                                                                                                                                                                                    | Standard of care facility                                                                                              |
|-----------------------------------------|--------------------------------------------------------------------------------------------------------------------------------------------------------------------------------------------------------------------------|------------------------------------------------------------------------------------------------------------------------|
| Counselling for TB adherence            | Initial patient education on adherence counselling will be provided as per standard of care                                                                                                                              | Initial patient education on adherence counselling will be provided                                                    |
| Registration and informed consent       | Adult patients in the intervention arm who agree to use of the DAT provide consent<br>Patient will be registered on ASCENT adherence platform and upon registration receive confirmation verbally and/or by text message | -                                                                                                                      |
| Explain DAT                             | HCW explains how patient can use DAT (standardised script) and pictorial leaflet                                                                                                                                         | -                                                                                                                      |
| Treatment provision                     | Self-administration of TB medication with support of DAT                                                                                                                                                                 | As per standard of care (DOT at health facility or patient' home or self-administration) dependent on country          |
| Provide TB medication                   | As per standard of care                                                                                                                                                                                                  | As per standard of care                                                                                                |
| Daily dosing reminder                   | A reminder message to patient will be sent in case a dose was not recorded on the platform.<br>Depending on patient preference, the smart pill box can also remind patients for medication intake using LED and/or sound | -                                                                                                                      |
| Follow-up visits for treatment          | Patients will be provided a return date to visit the health facility for refill                                                                                                                                          | As per standard of care                                                                                                |
| Follow-up visit for treatment reminders | Depending on the DAT-, patient- and health care worker preferences, patients can receive a reminder for follow-up visit via text message or via DAT.                                                                     | -                                                                                                                      |
| Patient adherence data                  | Information on adherence will be collected via DAT and real-time available via ASCENT adherence platform for health staff                                                                                                | As per standard of care (pill counts, patient treatment cards etc). Only available when patient visits health facility |
| Follow up visit(s) during treatment     | Health care workers have access to the ASCENT adherence platform and will use the patient' adherence calendar for counselling                                                                                            | Health care workers will review the patient's verbal report on adherence and counsel patients accordingly              |
| Education and motivational messages     | Patients can receive periodic educational and motivational messages                                                                                                                                                      | -                                                                                                                      |
| Patient access to adherence information | Patients can have access to their own adherence data                                                                                                                                                                     | -                                                                                                                      |

365

366

367

368



1  
2  
3  
4  
5  
6  
7  
8  
9  
10  
11  
12  
13  
14  
15  
16  
17  
18  
19  
20  
21  
22  
23  
24  
25  
26  
27  
28  
29  
30  
31  
32  
33  
34  
35  
36  
37  
38  
39  
40  
41  
42  
43  
44  
45  
46  
47  
48  
49  
50  
51  
52  
53  
54  
55  
56  
57  
58  
59  
60**369 Study procedures in intervention facilities only**

370 All TB patients at the participating facilities are screened by the TB care provider (TB  
371 focal person) for eligibility. All adults (as defined by national law, male and female)  
372 with DS-TB who are initiated on TB treatment at the health facility are eligible for  
373 inclusion in the study. We have made the inclusion criteria as inclusive as possible in  
374 order to reflect the real-world impact of the digital adherence technology. There are  
375 no specific exclusion criteria. Eligible patients are offered enrollment in the study  
376 followed by the process to obtain written informed consent. Consented participants  
377 are then registered onto the ASCENT adherence platform.

378

379 In facilities that are randomized to the smart pill box; consented participants are given  
380 their TB medication and instructional booklet inside the box. Upon each opening, the  
381 box sends a signal to the ASCENT platform that is recorded in a digital log for the  
382 patient. Participants are asked to bring the box with them at each visit for medication  
383 refill and to return the box at completion of therapy.

384

385 In facilities randomized to the medication sleeve/label, participants are provided their  
386 medication with packaging (either sleeve or label) that provides instructions, phone  
387 numbers and codes along with instructional booklet. Instructions direct participants  
388 upon taking their medication every day to send the code to the number using text  
389 messaging that records the dose on the ASCENT platform. Those patients who do not  
390 own a phone or who are uncomfortable using a shared phone are allowed to use a  
391 smart pill box. Patients in the intervention arm – either smart pill box or medication  
392 sleeve/label – can also receive reminder messages via SMS.

393

394 Adverse consequences of the trial include inadvertent disclosure of TB status due to  
395 the association of the DAT with TB treatment and/or receiving SMSs related to TB  
396 treatment. These events are collected by the health care workers in a “social harms  
397 register” at facility and monitored by study personnel either during phone calls or  
398 periodic visits to facilities.

399

400 Patients enrolled in the DAT employ self-administration of TB medication using the  
401 DAT and support according to the differentiated response according to the data  
402 logged to the ASCENT platform. Participants at SOC facilities and those at DAT

1  
2  
3 403 facilities who do not consent to use the DAT take their medication according to  
4 404 standard of care for the facility and under the NTP guidelines (See supplemental  
5 405 information). Adherence data and treatment follow-up is also according to the country  
6 406 specific NTP guidelines.  
7  
8  
9

10 407

### 11 12 13 408 ***Data Management***

14  
15 409 Data from the DATs will be collected from the ASCENT adherence platform (patients  
16 410 on the intervention only) using the Everwell Hub, a cloud-based or in-country  
17 411 (Tanzania) hosted infrastructure according to country regulations. Patient data are  
18 412 collected on the ASCENT adherence platform, with permission from the participant  
19 413 provided in the informed consent. The ASCENT platform allows the TB health care  
20 414 providers to review patient medication adherence logged from the DAT and track  
21 415 SMS communications with patients. Data privacy is protected with access to the  
22 416 platform being password protected with defined data access that allows health care  
23 417 providers, but not researchers, to view personal identifying data.  
24  
25  
26  
27  
28  
29

30 418

31  
32 419 Treatment outcome data are from the routine reporting to the NTP and are electronic  
33 420 in the Philippines and Ukraine and abstracted from paper TB registers in Tanzania  
34 421 and South Africa. These data are collected for all patients (excluding those who opt-  
35 422 out) and are imported/entered into the ASCENT research database hosted in-country  
36 423 using REDcap, a secure web database application. (19)  
37  
38  
39  
40

41 424

42 425 The routine data in the ASCENT research database are linked to deidentified  
43 426 individual patient data from the ASCENT platform using a corresponding electronic  
44 427 or paper record that has the TB registration number and ASCENT platform ID.  
45  
46  
47

48 428

### 49 50 429 ***Trial Governance***

51  
52 430 A Technical Advisory Group (TAG) has been set up to provide oversight, monitor  
53 431 and oversee progress for this four-country study and its companion study in Ethiopia.  
54 432 The TAG meets every 6 months and is composed of representatives from the five  
55 433 countries and chaired by a senior researcher in Uganda.  
56  
57  
58

59 434  
60

1  
2  
3 435 Diverse in-country stakeholders provide input to the study through a Community  
4 436 Advisory Board (CAB) and/or other Civil Society Organizations (Tanzania).  
5  
6 437 Consultation was sought in order to involve former TB patients and their care  
7  
8 438 providers and various other stakeholders. The CABs were engaged beginning in the  
9  
10 439 preparatory phase to provide input and advice into the facility selection and  
11  
12 440 randomization procedures. They were further consulted after the preparatory phase in  
13  
14 441 order to arrive at the specific country differentiated response algorithm.  
15  
16 442

### 17 18 443 ***Statistical Analysis Plan***

19  
20 444 Statistical analyses will employ appropriate methods for the cluster randomized trial  
21  
22 445 design. We will conduct an intention-to-treat approach to evaluate treatment outcomes  
23  
24 446 in the DAT arm relative to the SOC. Additionally, two separate analyses will be  
25  
26 447 performed to evaluate the individual DAT - smart pill box or medication label/sleeve  
27  
28 448 – in relation to the SOC. For South Africa, Tanzania and the Philippines we will  
29  
30 449 employ a logistic regression model with random effects (to account for clustering at  
31  
32 450 the facility-level) to estimate the respective intervention effect as an odds ratio and  
33  
34 451 associated 95% confidence interval adjusted for variables employed in randomization  
35  
36 452 strata. Adjustment for other patient level covariates will be employed where  
37  
38 453 imbalance exists between the study arms. Sub-group analyses will be examined to  
39  
40 454 examine heterogeneity of effect among patient characteristics including, urban/rural,  
41  
42 455 gender and country specific health care delivery circumstances, and type of TB  
43  
44 456 (pulmonary or extra-pulmonary). (20) A detailed statistical analysis plan will be  
45  
46 457 finalized before the end of follow-up and data are unblinded.

### 47 48 458 ***Sub-studies***

49  
50 459 As part of the process evaluation of DAT interventions in each of the four countries, a  
51  
52 460 series of sub-studies are administered by ASCENT research personnel to a sub-set of  
53  
54 461 patients, health care workers and key stakeholders in a selection of facilities employed  
55  
56 462 in the effectiveness evaluation. In sub-study 1, acceptability and feasibility data will  
57  
58 463 be collected from TB patients. In sub-study 2, qualitative methods will explore the TB  
59  
60 464 patient experience using the DAT and explore differences in the experience by  
465  
466 gender. In sub-study 3, qualitative methods will explore the acceptability and

1  
2  
3 466 feasibility of implementing DAT and differentiated response among the health care  
4 467 workers providing TB care and relevant stakeholders.  
5  
6  
7 468

8  
9 469 ***Economic Evaluation and Impact Modelling***

10  
11 470 The decision to scale-up DATs in countries will need to consider the benefit to both  
12 471 the health system as well as to the individual. As TB is known to disproportionately  
13 472 affect the poor, the use of DATs may decrease the economic burden placed on TB  
14 473 patients and address the END TB Strategy milestone of eliminating families facing  
15 474 catastrophic health costs due to TB. We will use effectiveness data as well as  
16 475 estimates of costs incurred by patients (collected in sub-study 1) and the service level  
17 476 costs to estimate the cost-effectiveness of utilizing DATs relative to the standard of  
18 477 care.  
19  
20  
21  
22  
23  
24  
25  
26

27 479 To the extent that DATs may impact treatment outcomes, it will be useful to  
28 480 understand the result on TB epidemiology in the country. The change in the treatment  
29 481 outcome from DAT relative to the SOC will inform a simple cohort model, in order to  
30 482 project the epidemiological impact, in terms of cases, incidence and prevalence, of  
31 483 scaling up of DAT in the respective countries.  
32  
33  
34  
35  
36  
37

38 485 ***Ethical considerations and dissemination***

39  
40 486 The study has been approved by the WHO Ethical Review Committee (0003296) and  
41 487 London School of Hygiene & Tropical Medicine Ethics Committee, United Kingdom  
42 488 (19135) following external peer review. Individual protocols have been reviewed and  
43 489 approved by relevant country specific committees: Single Joint Research Ethics Board  
44 490 (Philippines SJREB 2019-57); Wits Human Research Ethics Committee (South Africa  
45 491 AUR2-1-268); Tanzania Medical Research Coordinating Committee (MRCC) at  
46 492 National Institute for Medical Research, Dar es Salaam (Tanzania  
47 493 NIMR/HQ/R.8a/Vol.IX/3431); and Ukraine Ethics Committee of Public Health  
48 494 Center of the MOH of Ukraine (Ukraine IRB 2019-33).  
49  
50  
51  
52  
53  
54  
55  
56

57 496 Written informed consents of TB patients for the main effectiveness study are  
58 497 collected from TB patients by the TB care providers at the intervention facilities. In  
59  
60

1  
2  
3 498 addition, a waiver of consent was obtained to access TB register data. Patients agree  
4  
5 499 to use the DAT and consent to have researchers use anonymized data collected to the  
6  
7 500 ASCENT Adherence platform. Informed consents for the sub-studies are collected by  
8  
9 501 research associates prior to the interviews. The individual-level data sets visible to  
10  
11 502 research staff to monitor the study and conduct analysis are de-identified. All  
12  
13 503 databases are maintained in password-protected systems. Where paper records exist,  
14  
15 504 they are stored in the participating facilities in locked cabinets with access permitted  
16  
17 505 to only relevant facility health care providers and research team members.

17 506  
18  
19 507 The research findings will be presented first to national stakeholders, and  
20  
21 508 disseminated to the Community Advisory Board, stakeholders and participants in  
22  
23 509 each country at local meetings, and presented at national and international  
24  
25 510 conferences. The primary results of the study will be written as country-specific  
26  
27 511 articles for submission to suitable scientific journals along with deidentified research  
28  
29 512 datasets for the sake of reproducibility. Exclusive use of the data for further  
30  
31 513 publications will be given to the ASCENT consortium as well as the country's local  
32  
33 514 research community. Major changes to the study are communicated to the CAB and  
34  
35 515 TAG, updated to the protocol and trial registration, and reported to the ethics  
36  
37 516 committee for approval.

### 37 517 38 518 **Funding**

39 519 The study is funded by Unitaid (Grant Agreement Number: 2019-33-ASCENT).

### 40 520 41 521 **Contributorship statement**

42  
43 522 DJ contributed to designing the study, supervised implementation, wrote the first and  
44  
45 523 subsequent drafts and approved the final version. JL led the designing of the study,  
46  
47 524 coordinated ethical review processes, contributed to acquisition of resources, initiated  
48  
49 525 the write up of the first draft of the manuscript, and approved the final version. KvK  
50  
51 526 led acquisition of resources, contributed to study design, oversaw project  
52  
53 527 implementation, reviewed the first and subsequent drafts, and approved the final draft.  
54  
55 528 JvR contributed to resource acquisition and supervision of implementation and  
56  
57 529 reviewed the draft manuscript. CFM and MQ designed the transmission modelling,  
58  
59 530 contributed to supervising implementation, reviewed the draft manuscript, and  
60  
531 531 approved the final version. SC and NM contributed to study design, supervised

1  
2  
3 532 implementation in South Africa, and reviewed and approved the manuscript. KG, YT  
4 533 and AB supervised study implementation in Ukraine, and reviewed and approved the  
5 534 manuscript. AMCG and LM supervised study implementation in the Philippines and  
6 535 Tanzania respectively and reviewed and approved the manuscript. KF contributed to  
7 536 designing the study, developed statistical analysis plans, supervised implementation,  
8 537 and reviewed and approved the manuscript. The contents of the article are the  
9 538 responsibility of the authors alone and do not necessarily reflect the views of donors  
10 539 or employers of the authors.

#### 17 540 **Competing interests**

18 541 We declare we have no competing interest.

19 542

#### 23 543 **References**

24 544

- 25 545 1. Organization WH. Global Tuberculosis Report 20212022.
- 26 546 2. Raviglione M, Director G. Global strategy and targets for tuberculosis  
27 547 prevention, care and control after 2015. World Health Organization, Geneva. 2013.
- 28 548 3. Bayer R, Wilkinson D. Directly observed therapy for tuberculosis: history of  
29 549 an idea. *Lancet*. 1995;345(8964):1545-8.
- 30 550 4. Getahun B, Nkosi ZZ. Is directly observed tuberculosis treatment strategy  
31 551 patient-centered? A mixed method study in Addis Ababa, Ethiopia. *PLoS One*.  
32 552 2017;12(8):e0181205.
- 33 553 5. Alipanah N, Jarlsberg L, Miller C, Linh NN, Falzon D, Jaramillo E, et al.  
34 554 Adherence interventions and outcomes of tuberculosis treatment: A systematic review  
35 555 and meta-analysis of trials and observational studies. *PLoS medicine*.  
36 556 2018;15(7):e1002595.
- 37 557 6. Karumbi J, Garner P. Directly observed therapy for treating tuberculosis.  
38 558 *Cochrane Database Syst Rev*. 2015;2015(5):Cd003343.
- 39 559 7. Organization WH. Handbook for the use of digital technologies to support  
40 560 tuberculosis medication adherence. World Health Organization; 2017. Report No.:  
41 561 9241513454.
- 42 562 8. Bediang G, Stoll B, Elia N, Abena J-L, Geissbuhler A. SMS reminders to  
43 563 improve adherence and cure of tuberculosis patients in Cameroon (TB-SMS  
44 564 Cameroon): a randomised controlled trial. *BMC Public Health*. 2018;18(1):1-14.



- 1  
2  
3 565 9. Cattamanchi A, Crowder R, Kityamuwesi A, Kiwanuka N, Lamunu M,  
4 566 Namale C, et al. Digital adherence technology for tuberculosis treatment supervision:  
5 567 A stepped-wedge cluster-randomized trial in Uganda. *PLoS medicine*.  
6  
7 568 2021;18(5):e1003628.  
8  
9 569 10. Fang X-H, Guan S-Y, Tang L, Tao F-B, Zou Z, Wang J-X, et al. Effect of  
10 570 short message service on management of pulmonary tuberculosis patients in Anhui  
11 571 Province, China: a prospective, randomized, controlled study. *Medical science*  
12 572 *monitor: international medical journal of experimental and clinical research*.  
13 573 2017;23:2465.  
14  
15 574 11. Gashu KD, Gelaye KA, Lester R, Tilahun B. Effect of a phone reminder  
16 575 system on patient-centered tuberculosis treatment adherence among adults in  
17 576 Northwest Ethiopia: a randomised controlled trial. *BMJ Health & Care Informatics*.  
18 577 2021;28(1).  
19  
20 578 12. Liu X, Lewis JJ, Zhang H, Lu W, Zhang S, Zheng G, et al. Junying Chi, Jian  
21 579 Lu, Shitong Huan, Shiming Cheng, Lixia Wang, Shiwen Jiang, Daniel P. Chin, and  
22 580 Katherine L. Fielding. 2015. Effectiveness of Electronic Reminders to Improve  
23 581 Medication Adherence in Tuberculosis Patients: A Cluster-Randomised Trial. *PLoS*  
24 582 *Medicine*. 2015;12.  
25  
26 583 13. Mohammed S, Glennerster R, Khan AJ. Impact of a daily SMS medication  
27 584 reminder system on tuberculosis treatment outcomes: a randomized controlled trial.  
28 585 *PloS one*. 2016;11(11):e0162944.  
29  
30 586 14. Yoeli E, Rathouser J, Bhanot SP, Kimenye MK, Mailu E, Masini E, et al.  
31 587 Digital health support in treatment for tuberculosis. *New England Journal of*  
32 588 *Medicine*. 2019;381(10):986-7.  
33  
34 589 15. Liu X, Blaschke T, Thomas B, De Geest S, Jiang S, Gao Y, et al. Usability of  
35 590 a medication event reminder monitor system (MERM) by providers and patients to  
36 591 improve adherence in the management of tuberculosis. *Int J Environ Res Public*  
37 592 *Health*. 2017;14(10):1115.  
38  
39 593 16. Subbaraman R, De Mondesert L, Musiimenta A, Pai M, Mayer K, Thomas B,  
40 594 et al. Digital adherence technologies for the management of tuberculosis therapy:  
41 595 mapping the landscape and research priorities. *BMJ Glob Health*. 2018; 3 (5):  
42 596 e001018. doi: 10.1136/bmjgh-2018-001018. Epub 2018/10/27. [https://doi.](https://doi.org/10.1136/bmjgh-2018-001018)  
43 597 [org/10.1136/bmjgh-2018-001018](https://doi.org/10.1136/bmjgh-2018-001018) PMID: 30364330.  
44  
45  
46  
47  
48  
49  
50  
51  
52  
53  
54  
55  
56  
57  
58  
59  
60

- 1  
2  
3 598 17. Thomas BE, Kumar JV, Onongaya C, Bhatt SN, Galivanche A, Periyasamy  
4 599 M, et al. Explaining differences in the acceptability of 99DOTS, a cell phone-based  
5 600 strategy for monitoring adherence to tuberculosis medications: qualitative study of  
6 601 patients and health care providers. *JMIR mHealth and uHealth*. 2020;8(7):e16634.  
7  
8 602 18. Tadesse AW, Mohammed Z, Foster N, Quaife M, McQuaid CF, Levy J, et al.  
9 603 Evaluation of implementation and effectiveness of digital adherence technology with  
10 604 differentiated care to support tuberculosis treatment adherence and improve treatment  
11 605 outcomes in Ethiopia: a study protocol for a cluster randomised trial. *BMC Infectious*  
12 606 *Diseases*. 2021;21(1):1149.  
13  
14 607 19. Harris PA, Taylor R, Minor BL, Elliott V, Fernandez M, O'Neal L, et al. The  
15 608 REDCap consortium: Building an international community of software platform  
16 609 partners. *Journal of Biomedical Informatics*. 2019;95:103208.  
17  
18 610 20. Hayes RJ, Moulton LH. *Cluster randomised trials*: Chapman and Hall/CRC;  
19 611 2017.  
20  
21  
22  
23  
24  
25  
26  
27  
28  
29  
30  
31  
32  
33  
34  
35  
36  
37  
38  
39  
40  
41  
42  
43  
44  
45  
46  
47  
48  
49  
50  
51  
52  
53  
54  
55  
56  
57  
58  
59  
60



1  
2  
3  
4  
5  
6  
7  
8  
9  
10  
11  
12  
13  
14  
15  
16  
17  
18  
19  
20  
21  
22  
23  
24  
25  
26  
27  
28  
29  
30  
31  
32  
33  
34  
35  
36  
37  
38  
39  
40  
41  
42  
43  
44  
45  
46  
47  
48  
49  
50  
51  
52  
53  
54  
55  
56  
57  
58  
59  
60

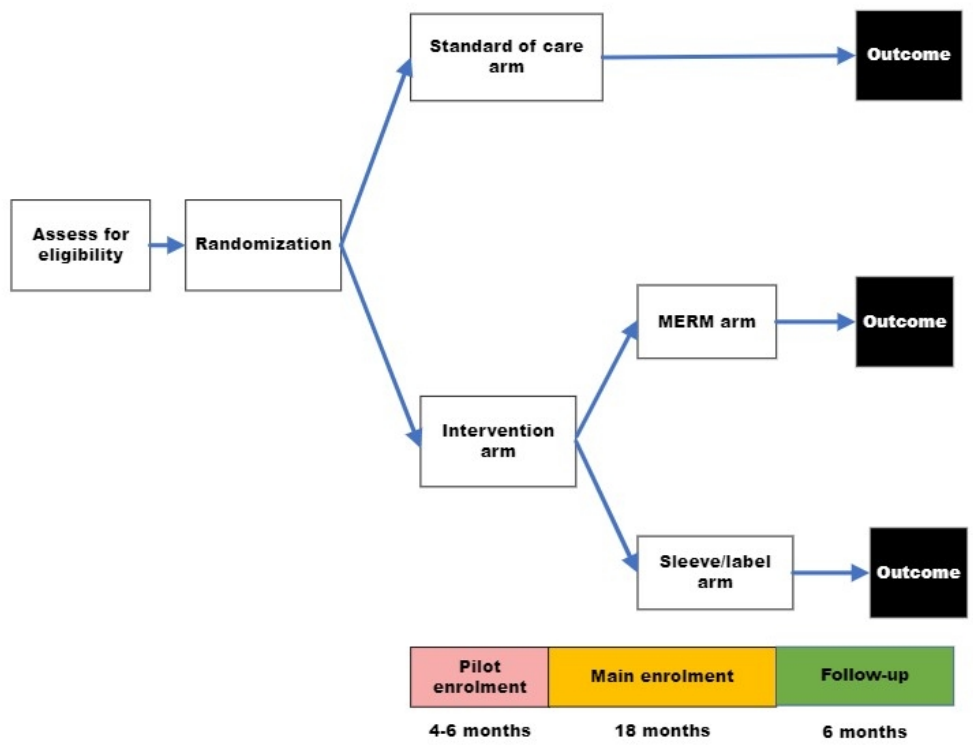

Overview of study design

155x118mm (120 x 120 DPI)

# BMJ Open

## Effectiveness of digital adherence technologies in improving tuberculosis treatment outcomes in four countries: a pragmatic cluster randomized trial protocol

|                                 |                                                                                                                                                                                                                                                                                                                                                                                                                                                                                                                                                                                                                                                                                                                                                                                                                                                                                                                                                                                      |
|---------------------------------|--------------------------------------------------------------------------------------------------------------------------------------------------------------------------------------------------------------------------------------------------------------------------------------------------------------------------------------------------------------------------------------------------------------------------------------------------------------------------------------------------------------------------------------------------------------------------------------------------------------------------------------------------------------------------------------------------------------------------------------------------------------------------------------------------------------------------------------------------------------------------------------------------------------------------------------------------------------------------------------|
| Journal:                        | <i>BMJ Open</i>                                                                                                                                                                                                                                                                                                                                                                                                                                                                                                                                                                                                                                                                                                                                                                                                                                                                                                                                                                      |
| Manuscript ID                   | bmjopen-2022-068685.R1                                                                                                                                                                                                                                                                                                                                                                                                                                                                                                                                                                                                                                                                                                                                                                                                                                                                                                                                                               |
| Article Type:                   | Protocol                                                                                                                                                                                                                                                                                                                                                                                                                                                                                                                                                                                                                                                                                                                                                                                                                                                                                                                                                                             |
| Date Submitted by the Author:   | 18-Jan-2023                                                                                                                                                                                                                                                                                                                                                                                                                                                                                                                                                                                                                                                                                                                                                                                                                                                                                                                                                                          |
| Complete List of Authors:       | <p>Jerene, Degu; KNCV Tuberculosis Foundation, Levy, Jens; KNCV Tuberculosis Foundation van Kalmthout, Kristian; KNCV Tuberculosis Foundation Rest, Job; KNCV Tuberculosis Foundation McQuaid, Christopher; London School of Hygiene &amp; Tropical Medicine, Infectious Disease Epidemiology Quaiife, Matthew; London School of Hygiene &amp; Tropical Medicine, Infectious Disease Epidemiology Charalambous, Salome; Aurum Institute, 29 Queens Road, Johannesburg, 2041, South Africa. Gamazina, Katya; PATH Garfin, AM Celina; Department of Health Mleoh , Liberate ; National Tuberculosis and Leprosy Programme, Dodoma, Tanzania, Department of Preventive Services Terleieva, Yana ; 7DepartmentDepartment of Coordination of TB Treatment Programs Bogdanov, Alexsey ; PATH Maraba, Noriah; Aurum Institute, 29 Queens Road, Johannesburg, 2041, South Africa. Fielding, Katherine; London School of Hygiene &amp; Tropical Medicine, Infectious Disease Epidemiology</p> |
| <b>Primary Subject Heading</b>: | Global health                                                                                                                                                                                                                                                                                                                                                                                                                                                                                                                                                                                                                                                                                                                                                                                                                                                                                                                                                                        |
| Secondary Subject Heading:      | Infectious diseases                                                                                                                                                                                                                                                                                                                                                                                                                                                                                                                                                                                                                                                                                                                                                                                                                                                                                                                                                                  |
| Keywords:                       | Tuberculosis < INFECTIOUS DISEASES, Public health < INFECTIOUS DISEASES, Tropical medicine < INFECTIOUS DISEASES, Epidemiology < INFECTIOUS DISEASES                                                                                                                                                                                                                                                                                                                                                                                                                                                                                                                                                                                                                                                                                                                                                                                                                                 |
|                                 |                                                                                                                                                                                                                                                                                                                                                                                                                                                                                                                                                                                                                                                                                                                                                                                                                                                                                                                                                                                      |

SCHOLARONE™  
Manuscripts

1  
2  
3  
4  
5  
6  
7  
8  
9  
10  
11  
12  
13  
14  
15  
16  
17  
18  
19  
20  
21  
22  
23  
24  
25  
26  
27  
28  
29  
30  
31  
32  
33  
34  
35  
36  
37  
38  
39  
40  
41  
42  
43  
44  
45  
46  
47  
48  
49  
50  
51  
52  
53  
54  
55  
56  
57  
58  
59  
60

1 **Effectiveness of digital adherence technologies in improving tuberculosis**  
2 **treatment outcomes in four countries: a pragmatic cluster randomized trial**  
3 **protocol**

4  
5  
6 Authors

7 Degu Jerene<sup>1</sup>, Jens Levy<sup>1</sup>, Kristian van Kalmthout<sup>1</sup>, Job van Rest<sup>1</sup>, Christopher Finn  
8 McQuaid<sup>2</sup>, Matthew Quaiife<sup>2</sup>, Salome Charalambous<sup>3</sup>, Katya Gamazina<sup>4</sup>, Anna Marie  
9 Celine G. Garfin<sup>5</sup>, Liberate Mleoh<sup>6</sup>, Yana Terleieva<sup>7</sup>, Alexsey Bogdanov<sup>4</sup>, Noriah  
10 Maraba<sup>3</sup>, Katherine Fielding<sup>2</sup>

11  
12 Affiliations

13 <sup>1</sup>KNCV Tuberculosis Foundation, the Hague, Netherlands

14 <sup>2</sup> TB Centre and Department of Infectious Disease Epidemiology, Faculty of  
15 Epidemiology and Population Health, London School of Hygiene & Tropical  
16 Medicine, London, UK

17 <sup>3</sup>The Aurum Institute, Johannesburg, South Africa

18 <sup>4</sup> PATH, Kiev, Ukraine

19 <sup>5</sup> Infectious Diseases for Prevention and Control Division, Disease Prevention and  
20 Control Bureau, Department of Health, Manila, the Philippines

21 <sup>6</sup>National TB and Leprosy Programme (NTLP), Ministry of Health and Social  
22 Welfare, Tanzania

23 <sup>7</sup>Department of Coordination of TB Treatment Programs, Kiev, Ukraine

24  
25  
26 Correspondence to Dr Degu Jerene

27 KNCV Tuberculosis Foundation, the Hague, Netherlands

28 [degujerene@gmail.com](mailto:degujerene@gmail.com)

29  
30  
31  
32 Journal: **BMJ Open**

1  
2  
3 35 Abstract

4  
5 36 **Introduction**

6  
7 37 Successful treatment of tuberculosis (TB) depends to a large extent on good  
8  
9 38 adherence to treatment regimens which relies on directly observed treatment (DOT).  
10  
11 39 This in turn requires frequent visits to health facilities. High costs to patients, stigma,  
12  
13 40 and burden to the health system challenged the DOT approach. Digital adherence  
14  
15 41 technologies (DATs) have emerged as possibly more feasible alternatives to DOT but  
16  
17 42 there is conflicting evidence on their effectiveness and feasibility. Our primary  
18  
19 43 objective is to evaluate whether the implementation of DATs with daily monitoring  
20  
21 44 and a differentiated response to patient adherence would reduce poor treatment  
22  
23 45 outcomes compared with the standard of care (SOC). Our secondary objectives  
24  
25 46 include: to evaluate the proportion of patients lost to follow-up; to compare  
26  
27 47 effectiveness by DAT type; to evaluate the feasibility and acceptability of DATs; to  
28  
29 48 describe factors affecting the longitudinal engagement of patients with the  
30  
31 49 intervention; and to use a simple model to estimate the epidemiological impact and  
32  
33 50 cost-effectiveness of the intervention from a health system perspective.

31  
32  
33 51  
34 52 **Methods and analysis**

35  
36 53 This is a pragmatic two-arm cluster-randomized trial in Philippines, South Africa,  
37  
38 54 Tanzania and Ukraine, with health facilities as the unit of randomization. Facilities  
39  
40 55 will first be randomized to either the DAT or SOC arm, and then the DAT arm will be  
41  
42 56 further randomized into medication sleeve/labels or smart pill box in a 1:1:2 ratio for  
43  
44 57 the smart pill box, medication sleeve/label or the SOC respectively. We will use data  
45  
46 58 from the digital adherence platform and routine health facility records for analysis. In  
47  
48 59 the main analysis, we will employ an intention-to-treat approach to evaluate treatment  
49  
50 60 outcomes.

48  
49  
50 61  
51 62 **Ethics and dissemination**

52  
53 63 The study has been approved by the WHO Research Ethics Review Committee  
54  
55 64 (0003296), and by country-specific committees. The results will be shared at national  
56  
57 65 and international meetings and will be published in peer-reviewed journals.

56  
57 66  
58  
59 67 Trial registration number: ISRCTN17706019  
60

1  
2  
3  
4  
5  
6  
7  
8  
9  
10  
11  
12  
13  
14  
15  
16  
17  
18  
19  
20  
21  
22  
23  
24  
25  
26  
27  
28  
29  
30  
31  
32  
33  
34  
35  
36  
37  
38  
39  
40  
41  
42  
43  
44  
45  
46  
47  
48  
49  
50  
51  
52  
53  
54  
55  
56  
57  
58  
59  
60

69 **Strengths and limitations of this study**

- 70 • This is a multi-country trial using rigorous methods to evaluate the effectiveness  
71 of DAT on treatment outcomes, going beyond measuring improvements in  
72 adherence to treatment
- 73 • The study will provide important evidence on patient and provider acceptability  
74 and feasibility necessary to provide country level guidance on decisions to adopt,  
75 implement and scale-up DATs across varying contexts
- 76 • Changes in the standard of care across countries due to the COVID-19 may have a  
77 confounding effect as some of the changes included the use of digital technologies

## 79 Introduction

80 About a quarter of the world population is infected with mycobacterium tuberculosis  
81 bacilli, and about 10 million people develop active tuberculosis (TB) each year. Of  
82 those with active TB, about a third are not detected by the health system.

83 Furthermore, >10% of those detected are not successfully treated. (1) As a result, the  
84 global TB treatment success rate remained below the 20% reduction interim target  
85 between 2015 and 2020. (2)

86  
87 To improve treatment outcomes, directly observed treatment (DOT) has been the  
88 standard recommendation since 1995. (3) However, DOT is no longer held as an  
89 adequate patient-centered model for TB care. (4) DOT by health care workers present  
90 challenges to patients owing to transportation costs, and lost income due to clinic  
91 appointments which can contribute to non-adherence. The evidence that DOT  
92 substantially improves treatment completion or cure relative to self-administration is  
93 mixed. (5, 6)

94  
95 In recent years, digital adherence technologies (DATs) such as electronic medication  
96 monitors and text messaging, have emerged as alternatives to DOT. (7) Electronic  
97 medication boxes are medication monitoring devices that store TB medications, give  
98 audio-visual reminders to the patient, and record and transmits patients' dosing  
99 history. The medication sleeve is a type of electronic medication monitor that consists  
100 of medication blisters wrapped in special envelopes with printed codes. Patients use  
101 these codes when making a toll-free call/text to let their health care provider know  
102 when they have taken their medication. (7) In addition to reminding patients to take  
103 their TB medications, DATs provide mechanisms for compiling patient dosing  
104 histories that provide their health care providers with the ability to monitor adherence  
105 and to provide prioritized follow-up differentiated care. While the use of DATs is  
106 recommended, evidence that such technologies improve treatment outcomes is still  
107 limited.

108  
109 Recent randomized studies in countries in Africa and Asia documented mixed results  
110 regarding effectiveness of medication monitoring to reduce poor medication  
111 adherence. (8-14) For the purposes of informing policy makers with information  
112 about when and where to use DATs, inference from Randomized Controlled Trials

1  
2  
3 113 (RCTs) is difficult because RCTs often do not reflect the real-life circumstances under  
4 114 which such tools would be employed in programmatic settings. Furthermore, the  
5 115 patient and health-care provider acceptability and uptake of these tools have been  
6 116 shown to be variable in different countries and settings. (15-17).  
7  
8  
9

10 117  
11 118 A more recent systematic review identified 16 RCTs that evaluated the effect of  
12 119 various digital health technology (DHT) interventions on TB treatment adherence and  
13 120 clinical outcomes. The DHT interventions evaluated included video directly observed  
14 121 therapy (VDOT), video-observed therapy (VOT), medication monitor boxes, short  
15 122 message text reminders, and ingestible sensors. (18). The interventions demonstrated  
16 123 variable effects in terms of both direction and extent, and those with personalized  
17 124 feedback component had a consistent and beneficial effect. Moreover, cultural or  
18 125 material circumstances may operate differently on the utility or acceptability of DATs  
19 126 to deliver the targeted treatment support. Data from individual randomized trials  
20 127 often do not provide country programs with the information needed to replicate their  
21 128 success in real-life settings and specific contexts. A pragmatic trial design  
22 129 implemented under real-life situation therefore is useful to provide the necessary  
23 130 evidence that can transform the way treatment support is provided in high TB burden  
24 131 settings.  
25  
26  
27  
28  
29  
30  
31  
32  
33  
34  
35

36 132  
37 133 The Adherence Support Coalition to End TB (ASCENT) study will evaluate  
38 134 effectiveness of medication sleeves/labels and smart pill boxes linked to a web-based  
39 135 adherence platform, to create a differentiated care response to patient adherence in  
40 136 relation to end of treatment outcomes. These DATs were selected based on several  
41 137 criteria including access to smartphones and broadband internet, type of ant-TB  
42 138 medication regimens in use, and stakeholder feedback as recommended in the WHO  
43 139 guidelines (7). Further, country-specific choice of DATs was decided based on  
44 140 experiences from the run-in phase of the study as described in the Methods section. A  
45 141 related study in Ethiopia will go further to provide effectiveness in relation to TB-free  
46 142 status within 6 months of end of treatment among patients with bacteriologically  
47 143 confirmed TB at baseline. (19). In addition to effectiveness, ASCENT will collect  
48 144 data on DAT engagement and fidelity to the adherence tools, costs, and projections of  
49 145 epidemiological impact and cost-effectiveness. Taken together, the ASCENT studies  
50 146 will provide valuable evidence of effectiveness as well as patient and provider  
51  
52  
53  
54  
55  
56  
57  
58  
59  
60

1  
2  
3 147 acceptability and feasibility necessary to provide country level guidance on decisions  
4 148 to adopt, implement and scale-up DATs across varying contexts around the world.

5  
6  
7 149

## 8 150 **Objectives**

### 9 151 Primary objective

10 152 The primary objective of this study is to evaluate whether the implementation of DAT  
11 153 with daily monitoring and differentiated response to patient adherence decreases the  
12 154 proportion of patients with poor treatment outcome compared to the standard of care  
13 155 in their respective countries. Poor treatment outcome is a composite of treatment  
14 156 outcomes that include death, treatment failure, or loss to follow-up (LTFU).

### 15 157 Secondary objectives

- 16 158 (i) To evaluate whether implementation of DAT with daily monitoring and a  
17 159 differentiated response to patient adherence decreases the proportion of adult  
18 160 drug-sensitive (DS-TB) patients lost to follow-up compared with the standard of  
19 161 care.
- 20 162 (ii) To explore the specific effect of standard of care versus (1) medication  
21 163 sleeve/label and (2) smart pill box with daily monitoring and a differentiated  
22 164 response to patient adherence on treatment outcomes among adult DS-TB patients
- 23 165 (iii) To describe longitudinal technology engagement of DS-TB and drug resistant TB  
24 166 (DR-TB) patients in the intervention arm
- 25 167 (iv) To describe the fidelity and characteristics associated with successful use of the  
26 168 intervention among DS-TB patients, including web-based platform usage  
27 169 statistics, technology failures or inability to engage with the DAT and mobile  
28 170 phone access
- 29 171
- 30 172 (v) To describe the longitudinal technology engagement of the smart pill box and  
31 173 video supported treatment and the (interim) treatment outcomes of patients
- 32 174 (vi) To project the epidemiological impact of scale-up of DAT with daily monitoring  
33 175 and a differentiated response to patient adherence compared with the standard of  
34 176 care as measured by the change in treatment outcome in the intervention relative  
35 177 to the standard of care among adult DS-TB patients
- 36 178 (vii) To explore the institutional feasibility and acceptability of implementing a  
37 179 DAT intervention and differentiated response to patient adherence in adult DS-TB  
38 180 and DR-TB patients.



181

182

## 183 **Methods/ Design**

### 184 ***Study design***

185

186 Figure 1 shows an overview of the study design. These are pragmatic two-arm cluster-  
187 randomized trials, with health facilities as the unit of randomization, conducted in  
188 four countries. Facilities in each country were randomized (1:1) to either the  
189 intervention (DAT) or SOC arm. A second randomization among the intervention arm  
190 clusters (1:1) was conducted to determine which of two interventions to employ  
191 (medication sleeve/label or smart pill box). In each country facilities from multiple  
192 regions/districts were randomized using stratification and restriction. Since labels  
193 were not implemented in Ukraine, the randomization was 1:1. In Ukraine, all Rayons  
194 (analogous to facilities) randomized to the DAT intervention will employ the smart-  
195 pill box, because fixed dose combinations do not exist for DS TB and would not be  
196 suitable for medication sleeves/labels.

197

198

### 199 ***Study setting***

200 The study is operating in four countries that are among the top 30 high-burden TB or  
201 MDR-TB countries: Ukraine, Tanzania, South Africa and the Philippines. See  
202 supplementary table for country TB profiles. These countries were selected based on  
203 epidemiological, socio- economic, geographic, infrastructural and health system  
204 factors. Facilities will include a mix of both large and small, urban and rural  
205 facilities. Eligible facilities needed to have previously notified TB patients and  
206 expressed willingness and capability to participate in study activities.

207

208

### 209 ***Study population***

210 All adult DS-TB patients in the intervention and standard of care facilities contribute  
211 to the effectiveness evaluation using their treatment outcomes as reflected in the TB  
212 registries, typically after 6 months. Participation in using the DAT intervention is

1  
2  
3 213 extended to all adult DS-TB patients in the selected intervention facilities upon  
4  
5 214 initiation of their therapy. In Ukraine where patients start treatment as inpatients,  
6  
7 215 participants start the intervention at discharge. Those providing consent will be  
8  
9 216 enrolled onto the ASCENT adherence platform and provided with the DAT.  
10  
11 217

### 12 13 218 *Interventions*

14  
15 219 In three countries (South Africa, Tanzania, and Philippines) facilities will be  
16  
17 220 randomized to one of two technologies (smart pill box or medication sleeve/label) to  
18  
19 221 transmit to the ASCENT web-based digital adherence platform for treatment  
20  
21 222 adherence monitoring. This allows the TB care provider to use the ASCENT  
22  
23 223 adherence data platform to evaluate daily dosing and offer differentiated care specific  
24  
25 224 to the country as appropriate.  
26

27 225  
28 226 The implementation starts with a run-in phase when in-country staff are trained, and  
29  
30 227 the DAT adherence platform is integrated into the patient care pathway, followed by  
31  
32 228 the main enrolment phase. After an introduction to the study and providing written  
33  
34 229 consent, all adults (locally defined) diagnosed with DS-TB are offered the DAT  
35  
36 230 technology and differentiated care intervention. By providing written informed  
37  
38 231 consent, patients agree to use the DAT assigned to the facility during their TB  
39  
40 232 treatment, and for researchers to (a) access their de-identified dosing history data on  
41  
42 233 the ASCENT adherence platform to support the health facility staff to operationalize  
43  
44 234 the DAT intervention and (b) use this de-identified data as well as accessing data on  
45  
46 235 treatment outcomes to evaluate effectiveness and fidelity of the intervention.  
47

48 236  
49 237 Figure 1- overview of the study design

### 50 238 **Intervention arm 1 – smart pill box (all countries)**

51 239 Upon providing informed consent, participants receive a smart pill box ((also known  
52  
53 240 as the Medication Event Reminder Monitor system or MERM). **We used**  
54  
55 241 **evriMED1000C- (Wisepill Technologies <https://www.wisepill.com/evrimed>) in**  
56  
57 242 **this study.** The TB drugs are placed in the smart pill box that is configured to  
58  
59 243 routinely signal a reminder to the patient by either an audible signal (beep) and/or a  
60  
244 blinking light once a day at a time based on the patient's preference. On a daily basis,

1  
2  
3 245 an electronic device embedded in the box sends a signal through a built-in mobile  
4 246 internet connection with all box openings of the patient to the Everwell Hub  
5 247 application platform. The Everwell Hub is an integrated platform for adherence and  
6 248 patient management where health care staff can log into a unified portal to register  
7 249 and follow up with patients, whose adherence reports from 99DOTS or evriMED  
8 250 devices. (20). If the internet connectivity is unavailable, the opening events are  
9 251 stored on the device to be uploaded upon resumption of connectivity.  
10  
11  
12  
13  
14  
15  
16  
17

### 18 253 **Intervention arm 2 – medication sleeves/labels**

19  
20 254 Upon providing informed consent, participants with secure access to a mobile phone  
21 255 employ one of two analogous methods to send notification of their dosing to the  
22 256 ASCENT platform. These were based on 99DOTS medication sleeves (99DOTS A  
23 257 low-cost digital adherence engagement tool <https://www.everwell.org/99dots>).  
24  
25  
26

27 258 Participants who do not have access to a mobile phone are given a smart pill box.  
28  
29

30 260 Participants have their Fixed Dose Combination (FDC) blister pack containing their  
31 261 medication placed in a custom card-stock medication sleeve with a series of  
32 262 unpredictable hidden codes that are revealed only upon removal of the daily pill. In  
33 263 countries where the FDC packaging was variable and therefore difficult to reliably  
34 264 supply custom cardstock, we employed a modified system called medication labels.  
35 265 Participants have a label, containing a code, placed on each of their fixed-dosed  
36 266 blister-packaged TB medication.  
37  
38  
39  
40  
41  
42  
43

44 268 For both methods, when their daily dose is taken, participants message the code using  
45 269 a toll-free text, which automatically logs their daily dose to the Everwell Hub  
46 270 application. Box opened or short message service (SMS) sent by patient is assumed to  
47 271 be dose taken.  
48  
49  
50

51 272

### 52 53 273 **The Standard of Care arm**

54 274 Patients in health facilities randomized to the control arm receive the current standard  
55 275 of care according to their country guidelines. In the Philippines and Tanzania, a  
56 276 treatment partner (TP) is identified by the patient and Public Health Nurse and  
57  
58  
59  
60

277 patients are either observed by the TP or self-administer “with trust”. In South Africa  
 278 patients employ self-administration, recording their taking medication on a TB card.  
 279 Non-adherence according to this may prompt DOT (either at home or in the clinic). In  
 280 Ukraine, outpatient adherence is monitored using either home-based or facility-based  
 281 DOT.

### 283 **Differentiated care delivery based on adherence to treatment**

284 Patients utilizing the DAT at facilities randomized to the intervention arm have their  
 285 adherence data recorded on the ASCENT adherence platform. These data are  
 286 displayed in real-time in a single view via the mobile Android app to allow health  
 287 care providers to visualize the data analytics and evaluate their medication taking  
 288 behavior. Health care providers are then able to identify patients who have not taken  
 289 their medication according to the patient calendar or by viewing Task Lists that  
 290 contain patients with 1, 2 or 3 days of non-adherence. They then employ constructive  
 291 measures to encourage timely medication adherence according to the differentiated  
 292 response algorithm approved by the National TB Program (NTP). These measures  
 293 include messaging educational reinforcements, reminders, phone calls and home visits  
 294 progressively. Each country has a differentiated response algorithm that has been  
 295 arrived at in consultation with the community advisory board, civil society stake  
 296 holders, and approved by the country NTP.

### 297 **Randomization**

298 Randomization of clusters (treatment facilities or Rayons in Ukraine) to intervention  
 299 or SOC arm were conducted by stratification and restriction in order to ensure balance  
 300 between the intervention arms and SOC arm. Studies in the Philippines, Ukraine and  
 301 Tanzania were stratified by poor treatment outcome and South Africa and the  
 302 Philippines by province. Restriction varied by country based on evaluation of  
 303 predictors of outcomes utilizing existing notification data. The stratification and  
 304 restriction variables are shown in Table 1.

305 Table 1. Stratification and restriction variables per country

| Country     | Stratification variables          | Restriction variables                                                 |
|-------------|-----------------------------------|-----------------------------------------------------------------------|
| Philippines | Province; poor treatment outcome* | Poor treatment outcome*; number of DS-TB notifications; facility type |

|              |                        |                                                                                                                                  |
|--------------|------------------------|----------------------------------------------------------------------------------------------------------------------------------|
| Ukraine      | Poor treatment outcome | Treatment failure*; number of DS-TB notifications; Oblast (district)                                                             |
| Tanzania     | Poor treatment outcome | treatment failure*; number of DS-TB notifications; urban (vs rural); HIV co-infection rate; facility serving mining communities. |
| South Africa | Province (2 strata)    | Treatment success*; urban/rural, number of DS-TB notifications; facility type                                                    |

306 \* Using data from a 12–18-month period abstracted from the TB register pre-  
 307 implementation of the intervention

308

### 309 ***Trial outcomes***

#### 310 **Primary outcome**

311 The primary endpoint is a poor end of treatment outcome, a composite indicator that  
 312 includes documented treatment failure, lost to follow-up or death.

#### 313 **Secondary outcomes**

#### 314 **Secondary outcomes – effectiveness and feasibility**

- 315 • The proportion of adult DS-TB patients who are lost to follow-up during  
 316 treatment
- 317 • Time to treatment completion, among DS-TB patients
- 318 • The proportion of adult DS-TB patients with poor treatment outcomes for  
 319 standard of care versus (1) medication sleeves/labels and (2) smart pill box
- 320 • Intervention arm only:
- 321 • Patterns of longitudinal technology engagement in the intensive- and  
 322 continuation phase
- 323 • The proportion of patients who had a differentiated response due to non-  
 324 adherence, among all patients and among non-adherent patients
- 325 • The proportion of patients who received phone calls, home visits, and  
 326 motivational counselling due to non-adherence

#### 327 **Secondary outcomes - impact modelling**

- 1  
2  
3 328 • The change in the incidence of TB arising from the impact that DATs may  
4 329 have on TB transmission compared to current standard of care if the  
5 330 intervention were to be scaled up  
6  
7  
8 331 • A simplified cost-effectiveness of DAT compared to standard of care relative,  
9 332 considering changes in relevant cost drivers such as number of clinic visits,  
10 333 technology and training costs.

11  
12  
13  
14 334 **Secondary outcomes – DR-TB patients**

- 15 335 • Patterns of longitudinal technology engagement in the intensive- and  
16 336 continuation phase  
17  
18 337 • The proportion of adult DR-TB patients with poor (interim) treatment  
19 338 outcomes  
20  
21  
22  
23

24 340 There are several secondary outcomes which will be assessed in sub studies described  
25 341 further below.  
26  
27  
28 342

29  
30 343 **Sample size**

31  
32 344 For each country, we collected data from the TB registries in health facilities of the  
33 345 selected regions/districts to provide an estimate of the harmonic mean of the number  
34 346 of DS-TB registrations over an 18-month period and the percentage with poor  
35 347 treatment outcome (treatment failure, and death and lost to follow-up during  
36 348 treatment). We assumed a (conservative) coefficient of variation of poor outcome of  
37 349 0.35 to arrive at the number of facilities in each of arm (DAT or Control) required to  
38 350 detect a reduction in the percentage with poor treatment outcome by 30% with 90%  
39 351 power and a type 1 error of 5%. Notable exceptions were applied to Ukraine, where  
40 352 health facilities are administered within rayons and randomization occurred at this  
41 353 level instead of the health facility level in other countries (Table 2). In Ukraine, due to  
42 354 the high proportion with poor outcomes, the study was powered to detect a reduction  
43 355 of 50%.  
44  
45  
46  
47  
48  
49  
50  
51  
52

53 356  
54 357 Table 2. Estimated cluster size and associated assumptions per country

| Country | Harmonic Mean for the number of | Standard of care: poor treatment | Intervention: poor treatment | Clusters (facilities) per arm: |
|---------|---------------------------------|----------------------------------|------------------------------|--------------------------------|
|         |                                 |                                  |                              |                                |

|                     | <b>DS-TB<br/>registrations<br/>over 18<br/>months</b> | <b>outcomes<br/>(%)</b> | <b>outcomes<br/>(%)</b> | <b>90% power</b> |
|---------------------|-------------------------------------------------------|-------------------------|-------------------------|------------------|
| <b>Philippines</b>  | 350                                                   | 9%                      | 6.3%                    | 31               |
| <b>Tanzania</b>     | 113                                                   | 12%                     | 8.4%                    | 38               |
| <b>South Africa</b> | 253                                                   | 25%                     | 17.4%                   | 29               |
| <b>Ukraine</b>      | 176                                                   | 31%                     | 15.0%                   | 8 (Rayons)       |

358

359 ***Study procedures***360 **Study procedures in SOC and intervention facilities**

361 The four countries followed the same basic study procedures. In the SOC facilities,  
362 the procedures imposed by the study are minimal in order to reflect the standard  
363 practices relevant as the counterfactual experience for the intervention facilities. Table  
364 3 summarizes procedures in the SOC and intervention facilities.

365

366 Study procedures in the intervention facilities were similarly minimized to include the  
367 necessary informed consent. All patients at both intervention and SOC arms received  
368 the same anti-TB treatment regimens according to their country NTP guidelines. This  
369 included employing fixed-dose combinations in three countries (The Philippines,  
370 Tanzania, and South Africa) and loose doses in Ukraine. At treatment initiation,  
371 patients receive the same basic education based on NTP guidelines to ensure the same  
372 basic understanding of their tuberculosis and the importance of adherence to their  
373 treatment. TB focal persons and other health care staff underwent training for this in  
374 order to ensure a comparable baseline against which improvement from the DAT  
375 intervention.

376

377 Also, in both SOC and DAT facilities, the same information in the form of  
378 prominently displayed posters informing TB patients that the facility is participating  
379 in research and that information about their final de-identified treatment outcome will  
380 be collected. Patients were given the option to opt-out if they do not want that their  
381 data to be used for research purposes. Specifically, the poster states: "*If you are*  
382 *diagnosed with TB, information about the results of your treatment will be collected*

1  
2  
3 383 *without using your name. If you would like the results of your treatment not to be used*  
4  
5 384 *for this research, please inform the people giving you your TB care”.*  
6  
7 385  
8  
9 386  
10  
11  
12  
13  
14  
15  
16  
17  
18  
19  
20  
21  
22  
23  
24  
25  
26  
27  
28  
29  
30  
31  
32  
33  
34  
35  
36  
37  
38  
39  
40  
41  
42  
43  
44  
45  
46  
47  
48  
49  
50  
51  
52  
53  
54  
55  
56  
57  
58  
59  
60

For peer review only



387

388 **Table 3: Comparison of activities between intervention and standard of care**389 **facilities**

| Activities                              | Intervention facility                                                                                                                                                                                                    | Standard of care facility                                                                                              |
|-----------------------------------------|--------------------------------------------------------------------------------------------------------------------------------------------------------------------------------------------------------------------------|------------------------------------------------------------------------------------------------------------------------|
| Counselling for TB adherence            | Initial patient education on adherence counselling will be provided as per standard of care                                                                                                                              | Initial patient education on adherence counselling will be provided                                                    |
| Registration and informed consent       | Adult patients in the intervention arm who agree to use of the DAT provide consent<br>Patient will be registered on ASCENT adherence platform and upon registration receive confirmation verbally and/or by text message | -                                                                                                                      |
| Explain DAT                             | HCW explains how patient can use DAT (standardised script) and pictorial leaflet                                                                                                                                         | -                                                                                                                      |
| Treatment provision                     | Self-administration of TB medication with support of DAT                                                                                                                                                                 | As per standard of care (DOT at health facility or patient' home or self-administration) dependent on country          |
| Provide TB medication                   | As per standard of care                                                                                                                                                                                                  | As per standard of care                                                                                                |
| Daily dosing reminder                   | A reminder message to patient will be sent in case a dose was not recorded on the platform.<br>Depending on patient preference, the smart pill box can also remind patients for medication intake using LED and/or sound | -                                                                                                                      |
| Follow-up visits for treatment          | Patients will be provided a return date to visit the health facility for refill                                                                                                                                          | As per standard of care                                                                                                |
| Follow-up visit for treatment reminders | Depending on the DAT-, patient- and health care worker preferences, patients can receive a reminder for follow-up visit via text message or via DAT.                                                                     | -                                                                                                                      |
| Patient adherence data                  | Information on adherence will be collected via DAT and real-time available via ASCENT adherence platform for health staff                                                                                                | As per standard of care (pill counts, patient treatment cards etc). Only available when patient visits health facility |
| Follow up visit(s) during treatment     | Health care workers have access to the ASCENT adherence platform and will use the patient' adherence calendar for counselling                                                                                            | Health care workers will review the patient's verbal report on adherence and counsel patients accordingly              |
| Education and motivational messages     | Patients can receive periodic educational and motivational messages                                                                                                                                                      | -                                                                                                                      |
| Patient access to adherence information | Patients can have access to their own adherence data                                                                                                                                                                     | -                                                                                                                      |

390

391

392

393

1  
2  
3 394 **Study procedures in intervention facilities only**

4  
5 395 All TB patients at the participating facilities are screened by the TB care provider (TB  
6  
7 396 focal person) for eligibility. All adults (as defined by national law, male and female)  
8  
9 397 with DS-TB who are initiated on TB treatment at the health facility are eligible for  
10  
11 398 inclusion in the study. We have made the inclusion criteria as inclusive as possible in  
12  
13 399 order to reflect the real-world impact of the digital adherence technology. There are  
14  
15 400 no specific exclusion criteria. Eligible patients are offered enrollment in the study  
16  
17 401 followed by the process to obtain written informed consent. Consented participants  
18  
19 402 are then registered onto the ASCENT adherence platform.

20  
21  
22  
23  
24  
25  
26  
27  
28  
29  
30  
31  
32  
33  
34  
35  
36  
37  
38  
39  
40  
41  
42  
43  
44  
45  
46  
47  
48  
49  
50  
51  
52  
53  
54  
55  
56  
57  
58  
59  
60

403  
404 In facilities that are randomized to the smart pill box; consented participants are given  
405 their TB medication and instructional booklet inside the box. Upon each opening, the  
406 box sends a signal to the ASCENT platform that is recorded in a digital log for the  
407 patient. Participants are asked to bring the box with them at each visit for medication  
408 refill and to return the box at completion of therapy.

409

410 In facilities randomized to the medication sleeve/label, participants are provided their  
411 medication with packaging (either sleeve or label) that provides instructions, phone  
412 numbers and codes along with instructional booklet. Instructions direct participants  
413 upon taking their medication every day to send the code to the number using text  
414 messaging that records the dose on the ASCENT platform. Those patients who do not  
415 own a phone or who are uncomfortable using a shared phone are allowed to use a  
416 smart pill box. Patients in the intervention arm – either smart pill box or medication  
417 sleeve/label – can also receive reminder messages via SMS.

418

419 Adverse consequences of the trial include inadvertent disclosure of TB status due to  
420 the association of the DAT with TB treatment and/or receiving SMSs related to TB  
421 treatment. These events are collected by the health care workers in a “social harms  
422 register” at facility and monitored by study personnel either during phone calls or  
423 periodic visits to facilities.

424

425 Patients enrolled in the DAT employ self-administration of TB medication using the  
426 DAT and support according to the differentiated response according to the data  
427 logged to the ASCENT platform. Participants at SOC facilities and those at DAT

1  
2  
3 428 facilities who do not consent to use the DAT take their medication according to  
4 429 standard of care for the facility and under the NTP guidelines (See supplemental  
5 430 information). Adherence data and treatment follow-up is also according to the country  
6 431 specific NTP guidelines.  
7  
8  
9

10 432

### 11 12 13 433 ***Data Management***

14 434 Data from the DATs will be collected from the ASCENT adherence platform (patients  
15 435 on the intervention only) using the Everwell Hub, a cloud-based or in-country  
16 436 (Tanzania) hosted infrastructure according to country regulations. Patient data are  
17 437 collected on the ASCENT adherence platform, with permission from the participant  
18 438 provided in the informed consent. The ASCENT platform allows the TB health care  
19 439 providers to review patient medication adherence logged from the DAT and track  
20 440 SMS communications with patients. Data privacy is protected with access to the  
21 441 platform being password protected with defined data access that allows health care  
22 442 providers, but not researchers, to view personal identifying data.  
23  
24  
25  
26  
27  
28  
29

30 443

31  
32 444 Treatment outcome data are from the routine reporting to the NTP and are electronic  
33 445 in the Philippines and Ukraine and abstracted from paper TB registers in Tanzania  
34 446 and South Africa. These data are collected for all patients (excluding those who opt-  
35 447 out) and are imported/entered into the ASCENT research database hosted in-country  
36 448 using REDcap, a secure web database application. (21)  
37  
38  
39  
40

41 449

42 450 The routine data in the ASCENT research database are linked to deidentified  
43 451 individual patient data from the ASCENT platform using a corresponding electronic  
44 452 or paper record that has the TB registration number and ASCENT platform ID.  
45  
46  
47  
48

49 453

### 50 454 ***Trial Governance***

51  
52 455 A Technical Advisory Group (TAG) has been set up to provide oversight, monitor  
53 456 and oversee progress for this four-country study and its companion study in Ethiopia.  
54 457 The TAG meets every 6 months and is composed of representatives from the five  
55 458 countries and chaired by a senior researcher in Uganda.  
56  
57  
58  
59

60 459

1  
2  
3 460 Diverse in-country stakeholders provide input to the study through a Community  
4 Advisory Board (CAB) and/or other Civil Society Organizations (Tanzania).  
5 461  
6 462 Consultation was sought in order to involve former TB patients and their care  
7 providers and various other stakeholders. The CABs were engaged beginning in the  
8 463 preparatory phase to provide input and advice into the facility selection and  
9 464 randomization procedures. They were further consulted after the preparatory phase in  
10 465 order to arrive at the specific country differentiated response algorithm.  
11  
12 466  
13  
14 467

### 17 18 468 ***Statistical Analysis Plan***

19  
20 469 Statistical analyses will employ appropriate methods for the cluster randomized trial  
21 design. We will conduct an intention-to-treat approach to evaluate treatment outcomes  
22 470 in the DAT arm relative to the SOC. Additionally, two separate analyses will be  
23 471 performed to evaluate the individual DAT - smart pill box or medication label/sleeve  
24 472 – in relation to the SOC. For South Africa, Tanzania and the Philippines we will  
25 473 employ a logistic regression model with random effects (to account for clustering at  
26 474 the facility-level) to estimate the respective intervention effect as an odds ratio and  
27 475 associated 95% confidence interval adjusted for variables employed in randomization  
28 476 strata. Adjustment for other patient level covariates will be employed where  
29 477 imbalance exists between the study arms. Sub-group analyses will be examined to  
30 478 examine heterogeneity of effect among patient characteristics including, urban/rural,  
31 479 gender and country specific health care delivery circumstances, and type of TB  
32 480 (pulmonary or extra-pulmonary). (22) A detailed statistical analysis plan will be  
33 481 finalized before the end of follow-up and data are unblinded.  
34 482

### 35 36 483 ***Sub-studies***

37  
38 484 As part of the process evaluation of DAT interventions in each of the four countries, a  
39 485 series of sub-studies are administered by ASCENT research personnel to a sub-set of  
40 486 patients, health care workers and key stakeholders in a selection of facilities employed  
41 487 in the effectiveness evaluation. In sub-study 1, acceptability and feasibility data will  
42 488 be collected from TB patients. In sub-study 2, qualitative methods will explore the TB  
43 489 patient experience using the DAT and explore differences in the experience by  
44 490 gender. In sub-study 3, qualitative methods will explore the acceptability and  
45  
46  
47  
48  
49  
50  
51  
52  
53  
54  
55  
56  
57  
58  
59  
60

1  
2  
3 491 feasibility of implementing DAT and differentiated response among the health care  
4 492 workers providing TB care and relevant stakeholders.  
5  
6  
7 493  
8  
9

10 494 ***Economic Evaluation and Impact Modelling***

11 495 The decision to scale-up DATs in countries will need to consider the benefit to both  
12 496 the health system as well as to the individual. As TB is known to disproportionately  
13 497 affect the poor, the use of DATs may decrease the economic burden placed on TB  
14 498 patients and address the END TB Strategy milestone of eliminating families facing  
15 499 catastrophic health costs due to TB. We will use effectiveness data as well as  
16 500 estimates of costs incurred by patients (collected in sub-study 1) and the service level  
17 501 costs to estimate the cost-effectiveness of utilizing DATs relative to the standard of  
18 502 care.  
19  
20  
21  
22  
23  
24  
25  
26

27 504 To the extent that DATs may impact treatment outcomes, it will be useful to  
28 505 understand the result on TB epidemiology in the country. The change in the treatment  
29 506 outcome from DAT relative to the SOC will inform a simple cohort model, in order to  
30 507 project the epidemiological impact, in terms of cases, incidence and prevalence, of  
31 508 scaling up of DAT in the respective countries.  
32  
33  
34  
35  
36  
37

38 510 ***Ethical considerations and dissemination***

39 511 The study has been approved by the WHO Ethical Review Committee (0003296) and  
40 512 London School of Hygiene & Tropical Medicine Ethics Committee, United Kingdom  
41 513 (19135) following external peer review. Individual protocols have been reviewed and  
42 514 approved by relevant country specific committees: Single Joint Research Ethics Board  
43 515 (Philippines SJREB 2019-57); Wits Human Research Ethics Committee (South Africa  
44 516 AUR2-1-268); Tanzania Medical Research Coordinating Committee (MRCC) at  
45 517 National Institute for Medical Research, Dar es Salaam (Tanzania  
46 518 NIMR/HQ/R.8a/Vol.IX/3431); and Ukraine Ethics Committee of Public Health  
47 519 Center of the MOH of Ukraine (Ukraine IRB 2019-33).  
48  
49  
50  
51  
52  
53  
54  
55  
56

57 521 Written informed consents of TB patients for the main effectiveness study are  
58 522 collected from TB patients by the TB care providers at the intervention facilities. In  
59  
60

1  
2  
3 523 addition, a waiver of consent was obtained to access TB register data. Patients agree  
4 524 to use the DAT and consent to have researchers use anonymized data collected to the  
5 525 ASCENT Adherence platform. Informed consents for the sub-studies are collected by  
6 526 research associates prior to the interviews. The individual-level data sets visible to  
7 527 research staff to monitor the study and conduct analysis are de-identified. All  
8 528 databases are maintained in password-protected systems. Where paper records exist,  
9 529 they are stored in the participating facilities in locked cabinets with access permitted  
10 530 to only relevant facility health care providers and research team members.  
11  
12  
13  
14  
15  
16

17 531

18 532 The research findings will be presented first to national stakeholders, and  
19 533 disseminated to the Community Advisory Board, stakeholders and participants in  
20 534 each country at local meetings, and presented at national and international  
21 535 conferences. The primary results of the study will be written as country-specific  
22 536 articles for submission to suitable scientific journals along with deidentified research  
23 537 datasets for the sake of reproducibility. Exclusive use of the data for further  
24 538 publications will be given to the ASCENT consortium as well as the country's local  
25 539 research community. Major changes to the study are communicated to the CAB and  
26 540 TAG, updated to the protocol and trial registration, and reported to the ethics  
27 541 committee for approval.  
28  
29  
30  
31  
32  
33  
34  
35

36 542

### 37 543 **Trial status**

38 544 This is protocol version 2.1.1 dated 31 March 2021. Enrolled for the main trial has  
39 545 ended in August 2022 and follow up will continue through end of March 2023.  
40  
41  
42  
43  
44

45 546

### 46 547 **Funding**

47 548 The study is funded by Unitaid (Grant Agreement Number: 2019-33-ASCENT).  
48  
49

50 549

### 51 550 **Patient and public involvement**

52 551 Patients and other members of the public were represented in the community advisory  
53 552 boards of the study, but they were not directly involved in the design and conception  
54 553 of the study. We will share key findings of the study with the study community  
55 554 through local TB program coordinators.  
56  
57  
58  
59  
60

555

556

### 557 **Contributorship statement**

558 DJ contributed to designing the study, supervised implementation, wrote the first and  
559 subsequent drafts and approved the final version. JL led the designing of the study,  
560 coordinated ethical review processes, contributed to acquisition of resources, initiated  
561 the write up of the first draft of the manuscript, and approved the final version. KvK  
562 led acquisition of resources, contributed to study design, oversaw project  
563 implementation, reviewed the first and subsequent drafts, and approved the final draft.  
564 JvR contributed to resource acquisition and supervision of implementation and  
565 reviewed the draft manuscript. CFM and MQ designed the transmission modelling,  
566 contributed to supervising implementation, reviewed the draft manuscript, and  
567 approved the final version. SC and NM contributed to study design, supervised  
568 implementation in South Africa, and reviewed and approved the manuscript. KG, YT  
569 and AB supervised study implementation in Ukraine, and reviewed and approved the  
570 manuscript. AMCG and LM supervised study implementation in the Philippines and  
571 Tanzania respectively and reviewed and approved the manuscript. KF contributed to  
572 designing the study, developed statistical analysis plans, supervised implementation,  
573 and reviewed and approved the manuscript. The contents of the article are the  
574 responsibility of the authors alone and do not necessarily reflect the views of donors  
575 or employers of the authors.

576

### 577 **Competing interests**

578 We declare we have no competing interest.

579

### 580 **References**

581

- 582 1. World Health Organization. Global Tuberculosis Report 2021. World Health  
583 Organization, Geneva. 2022.
- 584 2. Raviglione M, Director G. Global strategy and targets for tuberculosis  
585 prevention, care and control after 2015. World Health Organization, Geneva. 2013.
- 586 3. Bayer R, Wilkinson D. Directly observed therapy for tuberculosis: history of  
587 an idea. *Lancet*. 1995;345(8964):1545-8.



- 588 4. Getahun B, Nkosi ZZ. Is directly observed tuberculosis treatment strategy  
589 patient-centered? A mixed method study in Addis Ababa, Ethiopia. *PLoS One*.  
590 2017;12(8):e0181205.
- 591 5. Alipanah N, Jarlsberg L, Miller C, Linh NN, Falzon D, Jaramillo E, et al.  
592 Adherence interventions and outcomes of tuberculosis treatment: A systematic review  
593 and meta-analysis of trials and observational studies. *PLoS medicine*.  
594 2018;15(7):e1002595.
- 595 6. Karumbi J, Garner P. Directly observed therapy for treating tuberculosis.  
596 *Cochrane Database Syst Rev*. 2015;2015(5):Cd003343.
- 597 7. World Health Organization. Handbook for the use of digital technologies to  
598 support tuberculosis medication adherence. World Health Organization; 2017. Report  
599 No.: 9241513454.
- 600 8. Bediang G, Stoll B, Elia N, Abena J-L, Geissbuhler A. SMS reminders to  
601 improve adherence and cure of tuberculosis patients in Cameroon (TB-SMS  
602 Cameroon): a randomised controlled trial. *BMC Public Health*. 2018;18(1):1-14.
- 603 9. Cattamanchi A, Crowder R, Kityamuwesi A, Kiwanuka N, Lamunu M,  
604 Namale C, et al. Digital adherence technology for tuberculosis treatment supervision:  
605 A stepped-wedge cluster-randomized trial in Uganda. *PLoS medicine*.  
606 2021;18(5):e1003628.
- 607 10. Fang XH, Guan SY, Tang L, Tao FB, Zou Z, Wang JX, Kan XH, Wang QZ,  
608 Zhang ZP, Cao H, Ma DC, Pan HF. Effect of Short Message Service on Management  
609 of Pulmonary Tuberculosis Patients in Anhui Province, China: A Prospective,  
610 Randomized, Controlled Study. *Med Sci Monit*. 2017 May 23;23:2465-2469. doi:  
611 10.12659/msm.904957. PMID: 28534476; PMCID: PMC5450853..
- 612 11. Gashu KD, Gelaye KA, Lester R, Tilahun B. Effect of a phone reminder  
613 system on patient-centered tuberculosis treatment adherence among adults in  
614 Northwest Ethiopia: a randomised controlled trial. *BMJ Health & Care Informatics*.  
615 2021;28(1).
- 616 12. Liu X, Lewis JJ, Zhang H, Lu W, Zhang S, Zheng G, et al. Junying Chi, Jian  
617 Lu, Shitong Huan, Shiming Cheng, Lixia Wang, Shiwen Jiang, Daniel P. Chin, and  
618 Katherine L. Fielding. 2015. Effectiveness of Electronic Reminders to Improve  
619 Medication Adherence in Tuberculosis Patients: A Cluster-Randomised Trial. *PLoS*  
620 *Medicine*. 2015;12.



- 1  
2  
3 621 13. Mohammed S, Glennerster R, Khan AJ. Impact of a daily SMS medication  
4 622 reminder system on tuberculosis treatment outcomes: a randomized controlled trial.  
5 623 PloS one. 2016;11(11):e0162944.  
6  
7  
8 624 14. Yoeli E, Rathouser J, Bhanot SP, Kimenye MK, Mailu E, Masini E, et al.  
9 625 Digital health support in treatment for tuberculosis. *New England Journal of*  
10 626 *Medicine*. 2019;381(10):986-7.  
11  
12 627 15. Liu X, Blaschke T, Thomas B, De Geest S, Jiang S, Gao Y, et al. Usability of  
13 628 a medication event reminder monitor system (MERM) by providers and patients to  
14 629 improve adherence in the management of tuberculosis. *Int J Environ Res Public*  
15 630 *Health*. 2017;14(10):1115.  
16  
17 631 16. Subbaraman R, De Mondesert L, Musiimenta A, Pai M, Mayer K, Thomas B,  
18 632 et al. Digital adherence technologies for the management of tuberculosis therapy:  
19 633 mapping the landscape and research priorities. *BMJ Glob Health*. 2018; 3 (5):  
20 634 e001018. doi: 10.1136/bmjgh-2018-001018. Epub 2018/10/27. [https://doi.](https://doi.org/10.1136/bmjgh-2018-001018)  
21 635 [org/10.1136/bmjgh-2018-001018](https://doi.org/10.1136/bmjgh-2018-001018) PMID: 30364330.  
22  
23 636 17. Thomas BE, Kumar JV, Onongaya C, Bhatt SN, Galivanche A, Periyasamy  
24 637 M, et al. Explaining differences in the acceptability of 99DOTS, a cell phone-based  
25 638 strategy for monitoring adherence to tuberculosis medications: qualitative study of  
26 639 patients and health care providers. *JMIR mHealth and uHealth*. 2020;8(7):e16634.  
27  
28 640 18. Ridho A, Alfian SD, van Boven JFM, Levita J, Yalcin EA, Le L, Alffenaar JW,  
29 641 Hak E, Abdulah R, Pradipta IS. Digital Health Technologies to Improve Medication  
30 642 Adherence and Treatment Outcomes in Patients With Tuberculosis: Systematic  
31 643 Review of Randomized Controlled Trials. *J Med Internet Res*. 2022 Feb  
32 644 23;24(2):e33062. doi: 10.2196/33062. PMID: 35195534; PMCID: PMC8908199.  
33  
34 645 19. Tadesse AW, Mohammed Z, Foster N, Quaife M, McQuaid CF, Levy J, et al.  
35 646 Evaluation of implementation and effectiveness of digital adherence technology with  
36 647 differentiated care to support tuberculosis treatment adherence and improve treatment  
37 648 outcomes in Ethiopia: a study protocol for a cluster randomised trial. *BMC Infectious*  
38 649 *Diseases*. 2021;21(1):1149.  
39  
40 650 20. Everwell Health Solutions. 99DOTS: low-cost monitoring and improving  
41 651 medication adherence. Bangalore: Everwell Health Solutions; 2023 (Cited 13 January  
42 652 2023). Available from <https://www.everwell.org/everwell-hub>

- 1  
2  
3 653 21. Harris PA, Taylor R, Minor BL, Elliott V, Fernandez M, O'Neal L, et al. The  
4 654 REDCap consortium: Building an international community of software platform  
5 655 partners. *Journal of Biomedical Informatics*. 2019;95:103208.  
6  
7  
8 656 22. Hayes RJ, Moulton LH. *Cluster randomised trials*: Chapman and Hall/CRC;  
9 657 2017.  
10  
11 658  
12  
13  
14  
15  
16  
17  
18  
19  
20  
21  
22  
23  
24  
25  
26  
27  
28  
29  
30  
31  
32  
33  
34  
35  
36  
37  
38  
39  
40  
41  
42  
43  
44  
45  
46  
47  
48  
49  
50  
51  
52  
53  
54  
55  
56  
57  
58  
59  
60

1  
2  
3  
4  
5  
6  
7  
8  
9  
10  
11  
12  
13  
14  
15  
16  
17  
18  
19  
20  
21  
22  
23  
24  
25  
26  
27  
28  
29  
30  
31  
32  
33  
34  
35  
36  
37  
38  
39  
40  
41  
42  
43  
44  
45  
46  
47  
48  
49  
50  
51  
52  
53  
54  
55  
56  
57  
58  
59  
60

| Year                     | 2021              |    |                                              |                                       | 2022 |              |                            |    | 2023          |               |          |                     |
|--------------------------|-------------------|----|----------------------------------------------|---------------------------------------|------|--------------|----------------------------|----|---------------|---------------|----------|---------------------|
| Quarters                 | Q1                | Q2 | Q3                                           | Q4                                    | Q1   | Q2           | Q3                         | Q4 | Q1            | Q2            | Q3       | Q4                  |
| Effectiveness evaluation | Preparatory phase |    | Enrollment of participants for study         |                                       |      |              |                            |    |               |               |          |                     |
|                          |                   |    | Data collection for effectiveness evaluation |                                       |      |              |                            |    |               |               | Analysis |                     |
| Substudy 1               |                   |    | Preparations                                 | Conduct survey                        |      |              | Present early findings     |    | Dissemination |               |          | Final dissemination |
| Substudies 2, 3, 4       |                   |    |                                              |                                       |      | Preparations | Data collection & analysis |    |               | Dissemination |          |                     |
| Cost/modeling            |                   |    |                                              | Data collection and model calibration |      |              |                            |    |               | Analysis      |          |                     |

SPRIT Figure showing study overview

130x103mm (120 x 120 DPI)

## ASCENT study country TB profiles

| Selected TB indicators (2021)                          | Philippines | South Africa | Tanzania | Ukraine |
|--------------------------------------------------------|-------------|--------------|----------|---------|
| Total TB incidence, per 100,000                        | 650         | 513          | 208      | 71      |
| HIV-positive TB incidence, per 100,000                 | 13          | 274          | 37       | 14      |
| Total new and relapse cases notified                   | 321 564     | 172 194      | 86,701   | 18,307  |
| Estimated proportion of new TB cases with MDR/RR TB    | 1.5%        | 4.1%         | 1.3%     | 31%     |
| TB treatment success rate, new and relapse 2020 cohort | 76%         | 78%          | 96%      | 77%     |

## ASCENT DATA USE AND SHARING

For the sake of transparency and reproducibility, all deidentified research datasets may be shared with the study sponsor overseeing research with permissions from countries

Data will be de-identified before release for sharing. Where there are indirect identifiers that could lead to deductive disclosure (e.g. name or location of health facility), these will be modified or removed from the dataset.

The ASCENT project is committed to protect the professional interests of the local co-investigators and to build scientific capacity among early career consortium investigators in participating countries. The project will therefore ensure that there will be a period of exclusive access to the data for researchers from the ASCENT consortium and local research community in each participating country.

### **Period of exclusive use**

Researchers from the ASCENT consortium (referred to as *study team*) who collected data have a legitimate interest in benefiting from their investment of time and effort. The ASCENT consortium also has a commitment to supporting capacity building for early career consortium researchers and local research communities in participating countries. Therefore, in each participating country, the study team and the local research community will have a period of exclusive access to the data for a defined period.

1. Exclusive use will be for a fixed period of 2 (two) years after the data lock, during which time the primary results will be published.

2. De-identified analysis datasets for the primary publications will be released as required by the journal, for replication purposes (“minimal data set”). Analysis datasets supporting other manuscripts will be posted as required by journals at the time of publication.

3. This period of exclusive access will maximise publications from the ASCENT early career consortium researchers and will also be opened to the local research community in each participating country to exploit the data before the full dataset is released on open-access. During the period of exclusive use, the ASCENT study team and local research community with approved publication concepts are provided access to ASCENT de-identified data by submission of a signed Data Access Agreement. Researchers agree that they will only use the data for the analyses in the approved publication concept.

During this period of exclusive use, requests made by the ASCENT study team will be reviewed by the ASCENT Trial Management Group. Requests made by the local research community, external to the ASCENT study team, are overseen by the ASCENT Technical Advisory Group (TAG). Access to and use of data will be restricted to projects approved by an ethics committee.

Local researchers, external to the ASCENT study team, who are granted access to the data are encouraged to engage with the ASCENT study team to ensure they have sufficient understanding of the study and the data elements.

### **After the period of exclusive use**

After the period of exclusive use, de-identified data will be made available to users outside of the ASCENT team and the local research community via a publicly available data repository. Data access is restricted to non-commercial use only (creative commons non-commercial licensing) and for projects approved by an ethics committee.

Any publications arising from the shared data must acknowledge the investigators who collected the data, the institutions involved, and the funding sources. A standard acknowledgement statement will be provided.

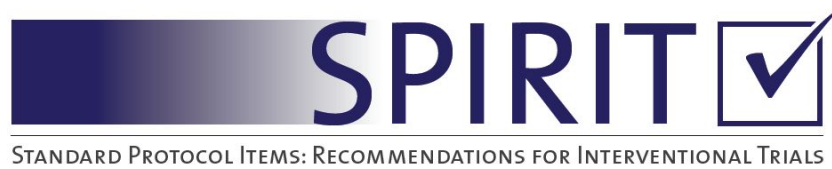

SPIRIT 2013 Checklist: Recommended items to address in a clinical trial protocol and related documents\*

| Section/item                      | Item No | Description                                                                                                                                                                                                                                                                              | Page  |
|-----------------------------------|---------|------------------------------------------------------------------------------------------------------------------------------------------------------------------------------------------------------------------------------------------------------------------------------------------|-------|
| <b>Administrative information</b> |         |                                                                                                                                                                                                                                                                                          |       |
| Title                             | 1       | Descriptive title identifying the study design, population, interventions, and, if applicable, trial acronym                                                                                                                                                                             | 1     |
| Trial registration                | 2a      | Trial identifier and registry name. If not yet registered, name of intended registry                                                                                                                                                                                                     | 2     |
|                                   | 2b      | All items from the World Health Organization Trial Registration Data Set                                                                                                                                                                                                                 | 2     |
| Protocol version                  | 3       | Date and version identifier                                                                                                                                                                                                                                                              | 21    |
| Funding                           | 4       | Sources and types of financial, material, and other support                                                                                                                                                                                                                              | 21    |
| Roles and responsibilities        | 5a      | Names, affiliations, and roles of protocol contributors                                                                                                                                                                                                                                  | 21-22 |
|                                   | 5b      | Name and contact information for the trial sponsor                                                                                                                                                                                                                                       | 21    |
|                                   | 5c      | Role of study sponsor and funders, if any, in study design; collection, management, analysis, and interpretation of data; writing of the report; and the decision to submit the report for publication, including whether they will have ultimate authority over any of these activities |       |
|                                   | 5d      | Composition, roles, and responsibilities of the coordinating centre, steering committee, endpoint adjudication committee, data management team, and other individuals or groups overseeing the trial, if applicable (see Item 21a for data monitoring committee)                         | 18-19 |
| <b>Introduction</b>               |         |                                                                                                                                                                                                                                                                                          |       |
| Background and rationale          | 6a      | Description of research question and justification for undertaking the trial, including summary of relevant studies (published and unpublished) examining benefits and harms for each intervention                                                                                       | 4-6   |

|    |                                                           |     |                                                                                                                                                                                                                                                                                                                                                                                |       |
|----|-----------------------------------------------------------|-----|--------------------------------------------------------------------------------------------------------------------------------------------------------------------------------------------------------------------------------------------------------------------------------------------------------------------------------------------------------------------------------|-------|
| 1  |                                                           |     |                                                                                                                                                                                                                                                                                                                                                                                |       |
| 2  |                                                           | 6b  | Explanation for choice of comparators                                                                                                                                                                                                                                                                                                                                          | 5     |
| 3  |                                                           |     |                                                                                                                                                                                                                                                                                                                                                                                |       |
| 4  | Objectives                                                | 7   | Specific objectives or hypotheses                                                                                                                                                                                                                                                                                                                                              | 6-7   |
| 5  |                                                           |     |                                                                                                                                                                                                                                                                                                                                                                                |       |
| 6  | Trial design                                              | 8   | Description of trial design including type of trial (eg, parallel group, crossover, factorial, single group), allocation ratio, and framework (eg, superiority, equivalence, noninferiority, exploratory)                                                                                                                                                                      | 7     |
| 7  |                                                           |     |                                                                                                                                                                                                                                                                                                                                                                                |       |
| 8  |                                                           |     |                                                                                                                                                                                                                                                                                                                                                                                |       |
| 9  |                                                           |     |                                                                                                                                                                                                                                                                                                                                                                                |       |
| 10 |                                                           |     |                                                                                                                                                                                                                                                                                                                                                                                |       |
| 11 |                                                           |     |                                                                                                                                                                                                                                                                                                                                                                                |       |
| 12 | <b>Methods: Participants, interventions, and outcomes</b> |     |                                                                                                                                                                                                                                                                                                                                                                                |       |
| 13 |                                                           |     |                                                                                                                                                                                                                                                                                                                                                                                |       |
| 14 | Study setting                                             | 9   | Description of study settings (eg, community clinic, academic hospital) and list of countries where data will be collected. Reference to where list of study sites can be obtained                                                                                                                                                                                             | 8     |
| 15 |                                                           |     |                                                                                                                                                                                                                                                                                                                                                                                |       |
| 16 |                                                           |     |                                                                                                                                                                                                                                                                                                                                                                                |       |
| 17 |                                                           |     |                                                                                                                                                                                                                                                                                                                                                                                |       |
| 18 |                                                           |     |                                                                                                                                                                                                                                                                                                                                                                                |       |
| 19 | Eligibility criteria                                      | 10  | Inclusion and exclusion criteria for participants. If applicable, eligibility criteria for study centres and individuals who will perform the interventions (eg, surgeons, psychotherapists)                                                                                                                                                                                   | 9     |
| 20 |                                                           |     |                                                                                                                                                                                                                                                                                                                                                                                |       |
| 21 |                                                           |     |                                                                                                                                                                                                                                                                                                                                                                                |       |
| 22 |                                                           |     |                                                                                                                                                                                                                                                                                                                                                                                |       |
| 23 |                                                           |     |                                                                                                                                                                                                                                                                                                                                                                                |       |
| 24 |                                                           |     |                                                                                                                                                                                                                                                                                                                                                                                |       |
| 25 | Interventions                                             | 11a | Interventions for each group with sufficient detail to allow replication, including how and when they will be administered                                                                                                                                                                                                                                                     | 9-12  |
| 26 |                                                           |     |                                                                                                                                                                                                                                                                                                                                                                                |       |
| 27 |                                                           |     |                                                                                                                                                                                                                                                                                                                                                                                |       |
| 28 |                                                           |     |                                                                                                                                                                                                                                                                                                                                                                                |       |
| 29 |                                                           |     |                                                                                                                                                                                                                                                                                                                                                                                |       |
| 30 |                                                           | 11b | Criteria for discontinuing or modifying allocated interventions for a given trial participant (eg, drug dose change in response to harms, participant request, or improving/worsening disease)                                                                                                                                                                                 | 17-18 |
| 31 |                                                           |     |                                                                                                                                                                                                                                                                                                                                                                                |       |
| 32 |                                                           |     |                                                                                                                                                                                                                                                                                                                                                                                |       |
| 33 |                                                           |     |                                                                                                                                                                                                                                                                                                                                                                                |       |
| 34 |                                                           |     |                                                                                                                                                                                                                                                                                                                                                                                |       |
| 35 |                                                           | 11c | Strategies to improve adherence to intervention protocols, and any procedures for monitoring adherence (eg, drug tablet return, laboratory tests)                                                                                                                                                                                                                              | 11-12 |
| 36 |                                                           |     |                                                                                                                                                                                                                                                                                                                                                                                |       |
| 37 |                                                           |     |                                                                                                                                                                                                                                                                                                                                                                                |       |
| 38 |                                                           |     |                                                                                                                                                                                                                                                                                                                                                                                |       |
| 39 |                                                           |     |                                                                                                                                                                                                                                                                                                                                                                                |       |
| 40 |                                                           | 11d | Relevant concomitant care and interventions that are permitted or prohibited during the trial                                                                                                                                                                                                                                                                                  | N/A   |
| 41 |                                                           |     |                                                                                                                                                                                                                                                                                                                                                                                |       |
| 42 |                                                           |     |                                                                                                                                                                                                                                                                                                                                                                                |       |
| 43 | Outcomes                                                  | 12  | Primary, secondary, and other outcomes, including the specific measurement variable (eg, systolic blood pressure), analysis metric (eg, change from baseline, final value, time to event), method of aggregation (eg, median, proportion), and time point for each outcome. Explanation of the clinical relevance of chosen efficacy and harm outcomes is strongly recommended | 13-14 |
| 44 |                                                           |     |                                                                                                                                                                                                                                                                                                                                                                                |       |
| 45 |                                                           |     |                                                                                                                                                                                                                                                                                                                                                                                |       |
| 46 |                                                           |     |                                                                                                                                                                                                                                                                                                                                                                                |       |
| 47 |                                                           |     |                                                                                                                                                                                                                                                                                                                                                                                |       |
| 48 |                                                           |     |                                                                                                                                                                                                                                                                                                                                                                                |       |
| 49 |                                                           |     |                                                                                                                                                                                                                                                                                                                                                                                |       |
| 50 |                                                           |     |                                                                                                                                                                                                                                                                                                                                                                                |       |
| 51 |                                                           |     |                                                                                                                                                                                                                                                                                                                                                                                |       |
| 52 | Participant timeline                                      | 13  | Time schedule of enrolment, interventions (including any run-ins and washouts), assessments, and visits for participants. A schematic diagram is highly recommended (see Figure)                                                                                                                                                                                               | 10    |
| 53 |                                                           |     |                                                                                                                                                                                                                                                                                                                                                                                |       |
| 54 |                                                           |     |                                                                                                                                                                                                                                                                                                                                                                                |       |
| 55 |                                                           |     |                                                                                                                                                                                                                                                                                                                                                                                |       |
| 56 |                                                           |     |                                                                                                                                                                                                                                                                                                                                                                                |       |
| 57 |                                                           |     |                                                                                                                                                                                                                                                                                                                                                                                |       |
| 58 |                                                           |     |                                                                                                                                                                                                                                                                                                                                                                                |       |
| 59 |                                                           |     |                                                                                                                                                                                                                                                                                                                                                                                |       |
| 60 |                                                           |     |                                                                                                                                                                                                                                                                                                                                                                                |       |

|   |             |    |                                                       |       |
|---|-------------|----|-------------------------------------------------------|-------|
| 1 |             |    |                                                       |       |
| 2 | Sample size | 14 | Estimated number of participants needed to achieve    | 14    |
| 3 |             |    | study objectives and how it was determined, including |       |
| 4 |             |    | clinical and statistical assumptions supporting any   |       |
| 5 |             |    | sample size calculations                              |       |
| 6 |             |    |                                                       |       |
| 7 | Recruitment | 15 | Strategies for achieving adequate participant         | 17-18 |
| 8 |             |    | enrolment to reach target sample size                 |       |
| 9 |             |    |                                                       |       |

### Methods: Assignment of interventions (for controlled trials)

#### Allocation:

|    |                |     |                                                           |     |
|----|----------------|-----|-----------------------------------------------------------|-----|
| 14 |                |     |                                                           |     |
| 15 | Sequence       | 16a | Method of generating the allocation sequence (eg,         | N/A |
| 16 | generation     |     | computer-generated random numbers), and list of any       |     |
| 17 |                |     | factors for stratification. To reduce predictability of a |     |
| 18 |                |     | random sequence, details of any planned restriction       |     |
| 19 |                |     | (eg, blocking) should be provided in a separate           |     |
| 20 |                |     | document that is unavailable to those who enrol           |     |
| 21 |                |     | participants or assign interventions                      |     |
| 22 |                |     |                                                           |     |
| 23 |                |     |                                                           |     |
| 24 | Allocation     | 16b | Mechanism of implementing the allocation sequence         | N/A |
| 25 | concealment    |     | (eg, central telephone; sequentially numbered,            |     |
| 26 | mechanism      |     | opaque, sealed envelopes), describing any steps to        |     |
| 27 |                |     | conceal the sequence until interventions are assigned     |     |
| 28 |                |     |                                                           |     |
| 29 |                |     |                                                           |     |
| 30 | Implementation | 16c | Who will generate the allocation sequence, who will       | N/A |
| 31 |                |     | enrol participants, and who will assign participants to   |     |
| 32 |                |     | interventions                                             |     |
| 33 |                |     |                                                           |     |
| 34 | Blinding       | 17a | Who will be blinded after assignment to interventions     | N/A |
| 35 | (masking)      |     | (eg, trial participants, care providers, outcome          |     |
| 36 |                |     | assessors, data analysts), and how                        |     |
| 37 |                |     |                                                           |     |
| 38 |                |     |                                                           |     |
| 39 |                | 17b | If blinded, circumstances under which unblinding is       | N/A |
| 40 |                |     | permissible, and procedure for revealing a                |     |
| 41 |                |     | participant's allocated intervention during the trial     |     |
| 42 |                |     |                                                           |     |

### Methods: Data collection, management, and analysis

|    |                 |     |                                                              |    |
|----|-----------------|-----|--------------------------------------------------------------|----|
| 43 |                 |     |                                                              |    |
| 44 |                 |     |                                                              |    |
| 45 | Data collection | 18a | Plans for assessment and collection of outcome,              | 18 |
| 46 | methods         |     | baseline, and other trial data, including any related        |    |
| 47 |                 |     | processes to promote data quality (eg, duplicate             |    |
| 48 |                 |     | measurements, training of assessors) and a                   |    |
| 49 |                 |     | description of study instruments (eg, questionnaires,        |    |
| 50 |                 |     | laboratory tests) along with their reliability and validity, |    |
| 51 |                 |     | if known. Reference to where data collection forms           |    |
| 52 |                 |     | can be found, if not in the protocol                         |    |
| 53 |                 |     |                                                              |    |
| 54 |                 |     |                                                              |    |
| 55 |                 |     |                                                              |    |
| 56 |                 | 18b | Plans to promote participant retention and complete          | 18 |
| 57 |                 |     | follow-up, including list of any outcome data to be          |    |
| 58 |                 |     | collected for participants who discontinue or deviate        |    |
| 59 |                 |     | from intervention protocols                                  |    |
| 60 |                 |     |                                                              |    |



|    |                                 |     |                                                           |       |
|----|---------------------------------|-----|-----------------------------------------------------------|-------|
| 1  |                                 |     |                                                           |       |
| 2  | Data                            | 19  | Plans for data entry, coding, security, and storage,      | 18    |
| 3  | management                      |     | including any related processes to promote data           |       |
| 4  |                                 |     | quality (eg, double data entry; range checks for data     |       |
| 5  |                                 |     | values). Reference to where details of data               |       |
| 6  |                                 |     | management procedures can be found, if not in the         |       |
| 7  |                                 |     | protocol                                                  |       |
| 8  |                                 |     |                                                           |       |
| 9  |                                 |     |                                                           |       |
| 10 | Statistical                     | 20a | Statistical methods for analysing primary and             | 19    |
| 11 | methods                         |     | secondary outcomes. Reference to where other              |       |
| 12 |                                 |     | details of the statistical analysis plan can be found, if |       |
| 13 |                                 |     | not in the protocol                                       |       |
| 14 |                                 |     |                                                           |       |
| 15 |                                 | 20b | Methods for any additional analyses (eg, subgroup         | 19    |
| 16 |                                 |     | and adjusted analyses)                                    |       |
| 17 |                                 |     |                                                           |       |
| 18 |                                 |     |                                                           |       |
| 19 |                                 | 20c | Definition of analysis population relating to protocol    | 19    |
| 20 |                                 |     | non-adherence (eg, as randomised analysis), and any       |       |
| 21 |                                 |     | statistical methods to handle missing data (eg,           |       |
| 22 |                                 |     | multiple imputation)                                      |       |
| 23 |                                 |     |                                                           |       |
| 24 |                                 |     |                                                           |       |
| 25 | <b>Methods: Monitoring</b>      |     |                                                           |       |
| 26 | Data monitoring                 | 21a | Composition of data monitoring committee (DMC);           | 18-19 |
| 27 |                                 |     | summary of its role and reporting structure; statement    |       |
| 28 |                                 |     | of whether it is independent from the sponsor and         |       |
| 29 |                                 |     | competing interests; and reference to where further       |       |
| 30 |                                 |     | details about its charter can be found, if not in the     |       |
| 31 |                                 |     | protocol. Alternatively, an explanation of why a DMC      |       |
| 32 |                                 |     | is not needed                                             |       |
| 33 |                                 |     |                                                           |       |
| 34 |                                 |     |                                                           |       |
| 35 |                                 |     |                                                           |       |
| 36 |                                 | 21b | Description of any interim analyses and stopping          | 18-19 |
| 37 |                                 |     | guidelines, including who will have access to these       |       |
| 38 |                                 |     | interim results and make the final decision to            |       |
| 39 |                                 |     | terminate the trial                                       |       |
| 40 |                                 |     |                                                           |       |
| 41 | Harms                           | 22  | Plans for collecting, assessing, reporting, and           | 18-19 |
| 42 |                                 |     | managing solicited and spontaneously reported             |       |
| 43 |                                 |     | adverse events and other unintended effects of trial      |       |
| 44 |                                 |     | interventions or trial conduct                            |       |
| 45 |                                 |     |                                                           |       |
| 46 |                                 |     |                                                           |       |
| 47 | Auditing                        | 23  | Frequency and procedures for auditing trial conduct, if   | N/A   |
| 48 |                                 |     | any, and whether the process will be independent          |       |
| 49 |                                 |     | from investigators and the sponsor                        |       |
| 50 |                                 |     |                                                           |       |
| 51 |                                 |     |                                                           |       |
| 52 | <b>Ethics and dissemination</b> |     |                                                           |       |
| 53 |                                 |     |                                                           |       |
| 54 | Research ethics                 | 24  | Plans for seeking research ethics                         | 20-21 |
| 55 | approval                        |     | committee/institutional review board (REC/IRB)            |       |
| 56 |                                 |     | approval                                                  |       |
| 57 |                                 |     |                                                           |       |
| 58 |                                 |     |                                                           |       |
| 59 |                                 |     |                                                           |       |
| 60 |                                 |     |                                                           |       |

|    |                   |     |                                                            |                           |
|----|-------------------|-----|------------------------------------------------------------|---------------------------|
| 1  |                   |     |                                                            |                           |
| 2  | Protocol          | 25  | Plans for communicating important protocol                 | 20-21                     |
| 3  | amendments        |     | modifications (eg, changes to eligibility criteria,        |                           |
| 4  |                   |     | outcomes, analyses) to relevant parties (eg,               |                           |
| 5  |                   |     | investigators, REC/IRBs, trial participants, trial         |                           |
| 6  |                   |     | registries, journals, regulators)                          |                           |
| 7  |                   |     |                                                            |                           |
| 8  |                   |     |                                                            |                           |
| 9  | Consent or assent | 26a | Who will obtain informed consent or assent from            | 20-21                     |
| 10 |                   |     | potential trial participants or authorised surrogates,     |                           |
| 11 |                   |     | and how (see Item 32)                                      |                           |
| 12 |                   |     |                                                            |                           |
| 13 |                   | 26b | Additional consent provisions for collection and use of    | N/A                       |
| 14 |                   |     | participant data and biological specimens in ancillary     |                           |
| 15 |                   |     | studies, if applicable                                     |                           |
| 16 |                   |     |                                                            |                           |
| 17 | Confidentiality   | 27  | How personal information about potential and enrolled      | 20-21                     |
| 18 |                   |     | participants will be collected, shared, and maintained     |                           |
| 19 |                   |     | in order to protect confidentiality before, during, and    |                           |
| 20 |                   |     | after the trial                                            |                           |
| 21 |                   |     |                                                            |                           |
| 22 |                   |     |                                                            |                           |
| 23 | Declaration of    | 28  | Financial and other competing interests for principal      | 22                        |
| 24 | interests         |     | investigators for the overall trial and each study site    |                           |
| 25 |                   |     |                                                            |                           |
| 26 | Access to data    | 29  | Statement of who will have access to the final trial       | In the annex              |
| 27 |                   |     | dataset, and disclosure of contractual agreements that     |                           |
| 28 |                   |     | limit such access for investigators                        |                           |
| 29 |                   |     |                                                            |                           |
| 30 |                   |     |                                                            |                           |
| 31 | Ancillary and     | 30  | Provisions, if any, for ancillary and post-trial care, and | N/A                       |
| 32 | post-trial care   |     | for compensation to those who suffer harm from trial       |                           |
| 33 |                   |     | participation                                              |                           |
| 34 |                   |     |                                                            |                           |
| 35 | Dissemination     | 31a | Plans for investigators and sponsor to communicate         | 21                        |
| 36 | policy            |     | trial results to participants, healthcare professionals,   |                           |
| 37 |                   |     | the public, and other relevant groups (eg, via             |                           |
| 38 |                   |     | publication, reporting in results databases, or other      |                           |
| 39 |                   |     | data sharing arrangements), including any publication      |                           |
| 40 |                   |     | restrictions                                               |                           |
| 41 |                   |     |                                                            |                           |
| 42 |                   |     |                                                            |                           |
| 43 |                   |     |                                                            |                           |
| 44 |                   | 31b | Authorship eligibility guidelines and any intended use     | Standard guidelines apply |
| 45 |                   |     | of professional writers                                    |                           |
| 46 |                   |     |                                                            |                           |
| 47 |                   | 31c | Plans, if any, for granting public access to the full      | In the annex              |
| 48 |                   |     | protocol, participant-level dataset, and statistical code  |                           |
| 49 |                   |     |                                                            |                           |
| 50 |                   |     |                                                            |                           |
| 51 | <b>Appendices</b> |     |                                                            |                           |
| 52 | Informed consent  | 32  | Model consent form and other related documentation         | In the annex              |
| 53 | materials         |     | given to participants and authorised surrogates            |                           |
| 54 |                   |     |                                                            |                           |
| 55 | Biological        | 33  | Plans for collection, laboratory evaluation, and storage   | N/A                       |
| 56 | specimens         |     | of biological specimens for genetic or molecular           |                           |
| 57 |                   |     | analysis in the current trial and for future use in        |                           |
| 58 |                   |     | ancillary studies, if applicable                           |                           |
| 59 |                   |     |                                                            |                           |
| 60 |                   |     |                                                            |                           |

1 \*It is strongly recommended that this checklist be read in conjunction with the SPIRIT 2013  
2 Explanation & Elaboration for important clarification on the items. Amendments to the  
3 protocol should be tracked and dated. The SPIRIT checklist is copyrighted by the SPIRIT  
4 Group under the Creative Commons "[Attribution-NonCommercial-NoDerivs 3.0 Unported](#)"  
5 license.  
6  
7  
8  
9  
10  
11  
12  
13  
14  
15  
16  
17  
18  
19  
20  
21  
22  
23  
24  
25  
26  
27  
28  
29  
30  
31  
32  
33  
34  
35  
36  
37  
38  
39  
40  
41  
42  
43  
44  
45  
46  
47  
48  
49  
50  
51  
52  
53  
54  
55  
56  
57  
58  
59  
60

For peer review only
