# Supplementary material for: Effectiveness of digital adherence technologies in improving tuberculosis treatment outcomes in four countries: a pragmatic cluster randomised trial protocol
Source: PubMed Central journal article supplement — BMJ Open. 2023 Mar 14;13(3):e068685. doi: 10.1136/bmjopen-2022-068685 (PMC10016242; doi:10.1136/bmjopen-2022-068685), 2023-03-14
Supplement: bmjopen-2022-068685supp001.pdf [file bmjopen-2022-068685supp001.pdf]

## ASCENT study country TB profiles

| Selected TB indicators (2021)                          | Philippines | South Africa | Tanzania | Ukraine |
|--------------------------------------------------------|-------------|--------------|----------|---------|
| Total TB incidence, per 100,000                        | 650         | 513          | 208      | 71      |
| HIV-positive TB incidence, per 100,000                 | 13          | 274          | 37       | 14      |
| Total new and relapse cases notified                   | 321 564     | 172 194      | 86,701   | 18,307  |
| Estimated proportion of new TB cases with MDR/RR TB    | 1.5%        | 4.1%         | 1.3%     | 31%     |
| TB treatment success rate, new and relapse 2020 cohort | 76%         | 78%          | 96%      | 77%     |
